# Supplementary material for: Design, synthesis, and in vitro and in silico studies of morpholine derived thiazoles as bovine carbonic anhydrase-II inhibitors
Source: Royal Society of Chemistry journal article supplement (doi:10.1039/d4ra03385j), 2024-01-01
Supplement: d4ra03385j1.pdf [file d4ra03385j1.pdf]

### <sup>1</sup>H NMR and <sup>13</sup>C NMR of 3:

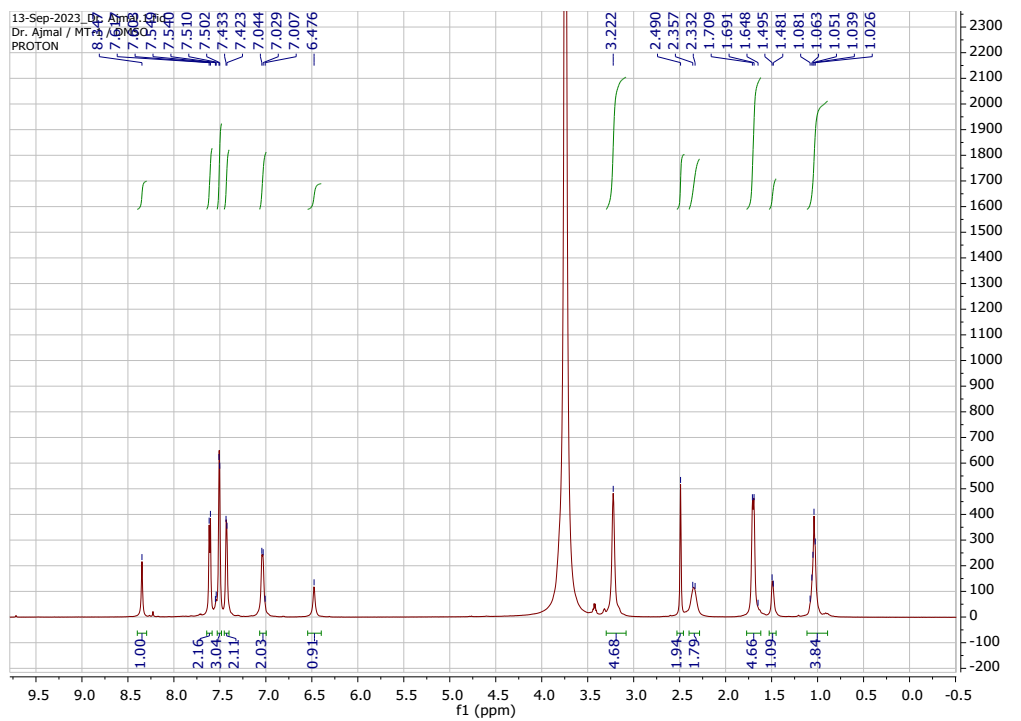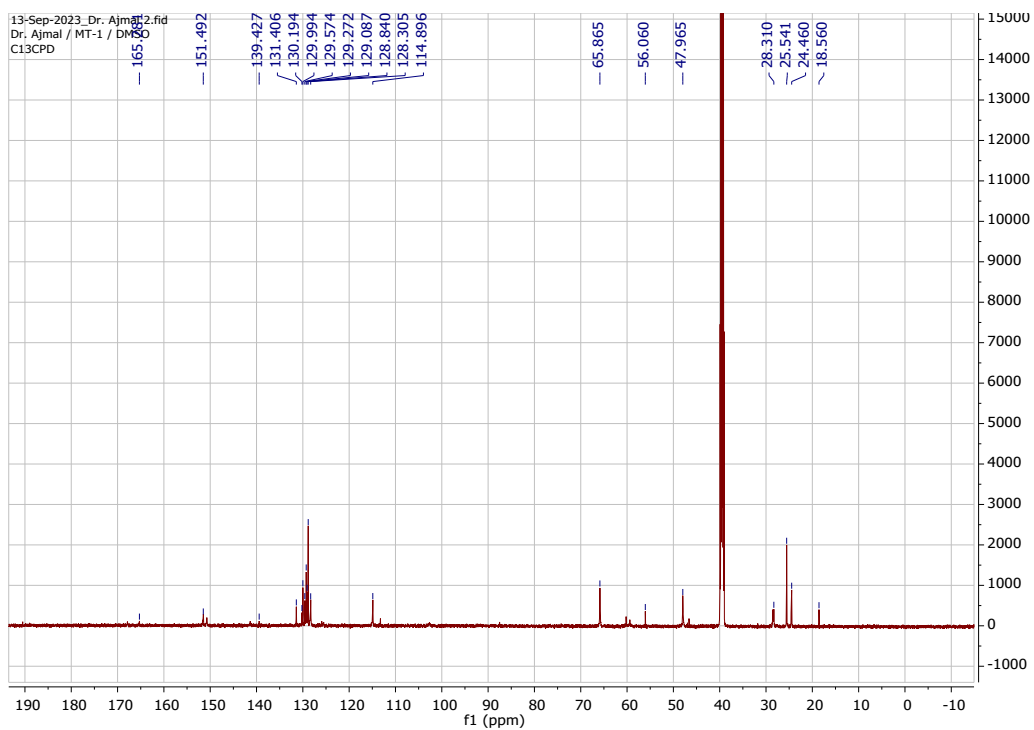

# HNMR and <sup>13</sup>CNMR of 4:

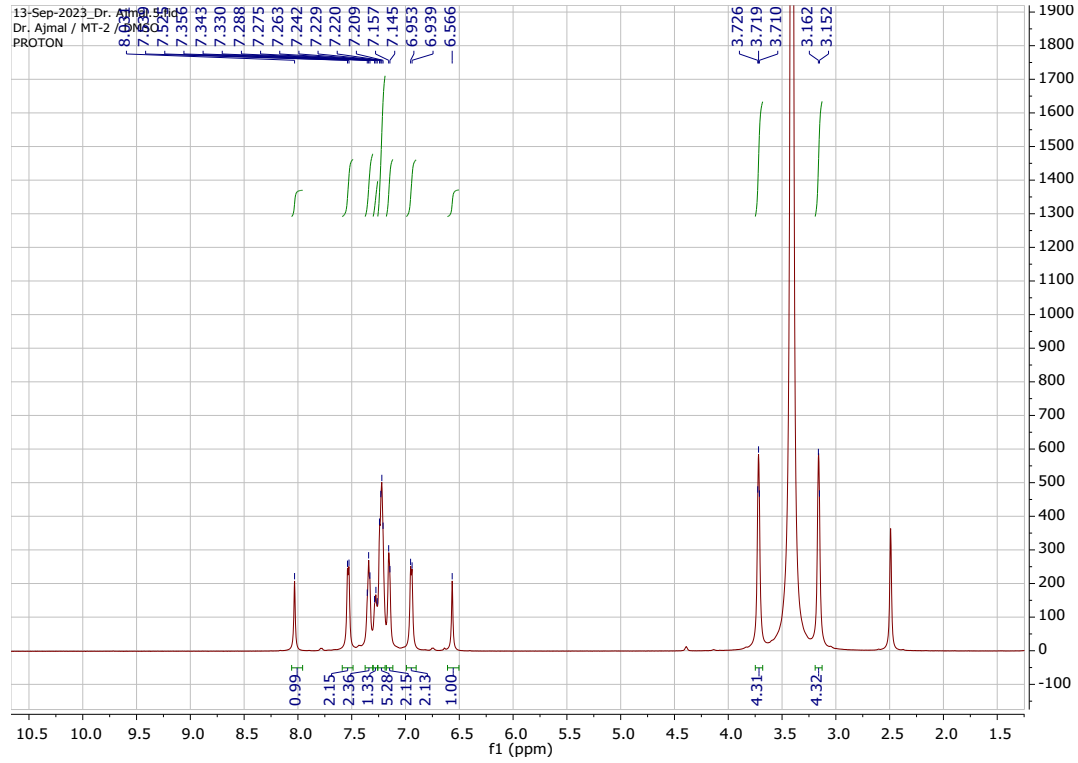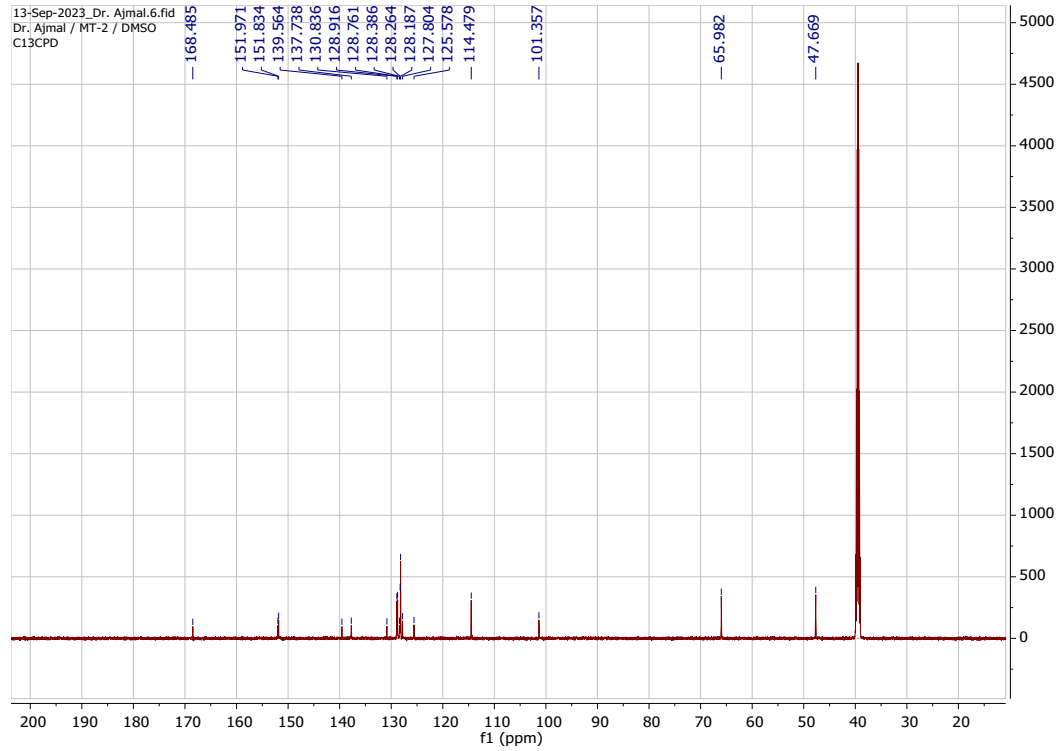

# <sup>1</sup>H NMR and <sup>13</sup>C NMR of 5:

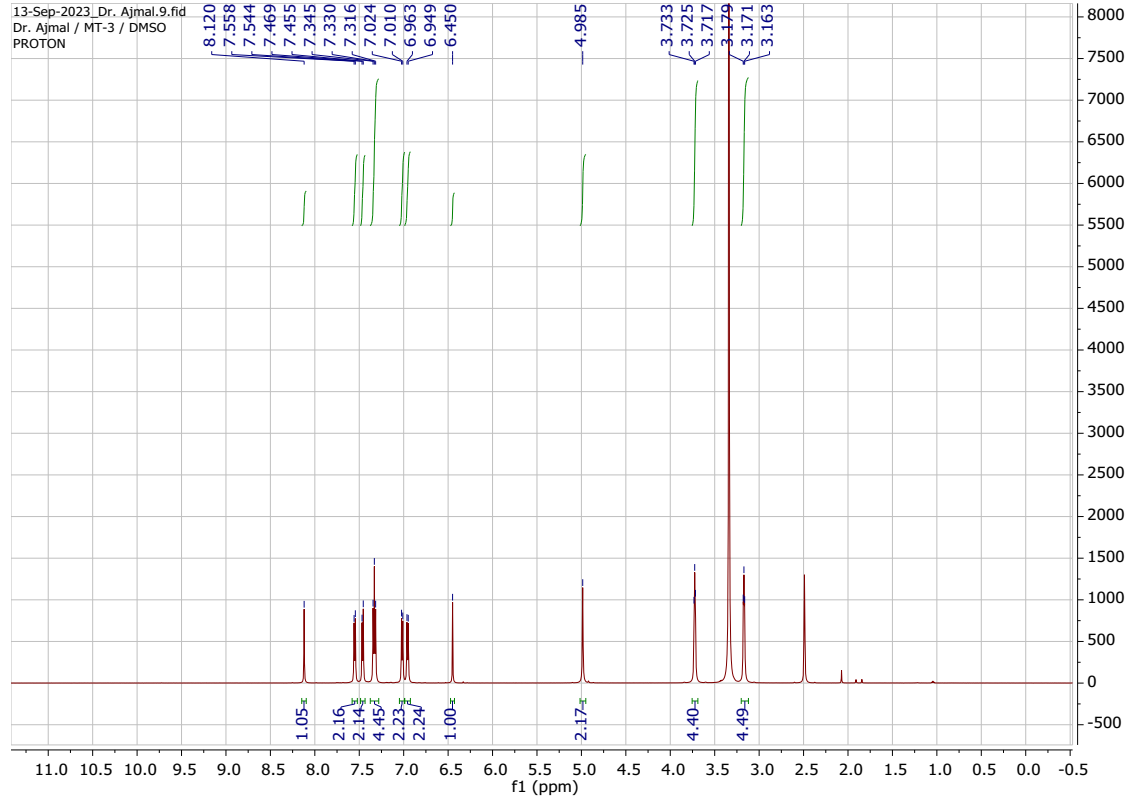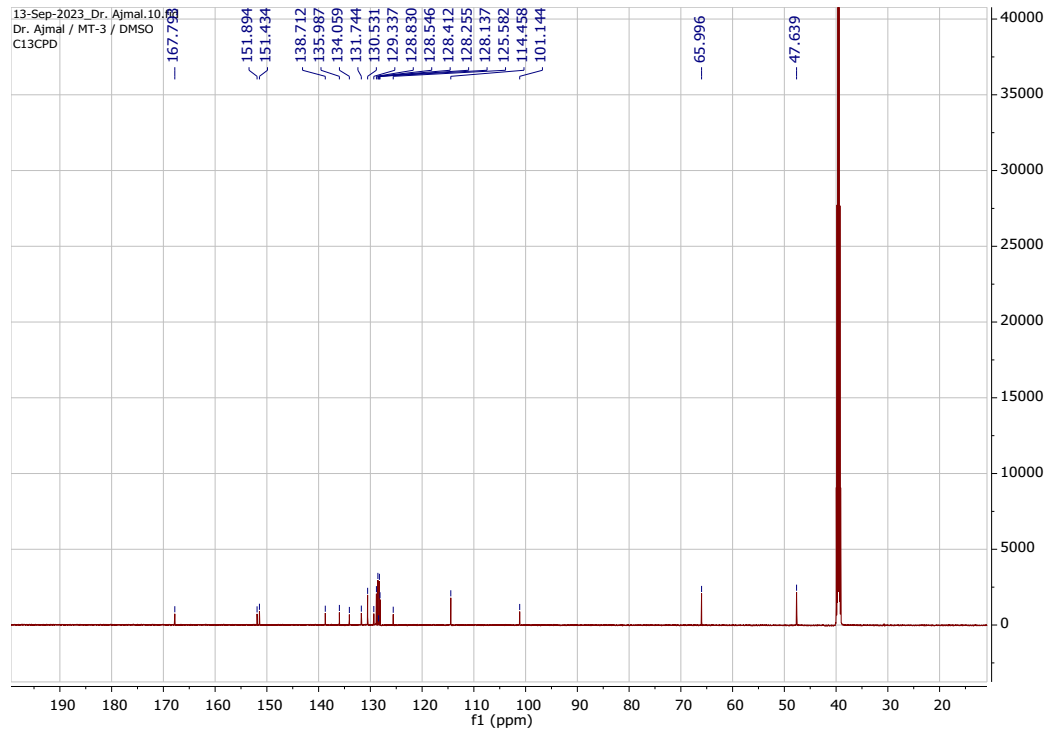

# <sup>1</sup>H NMR and <sup>13</sup>C NMR of 6:

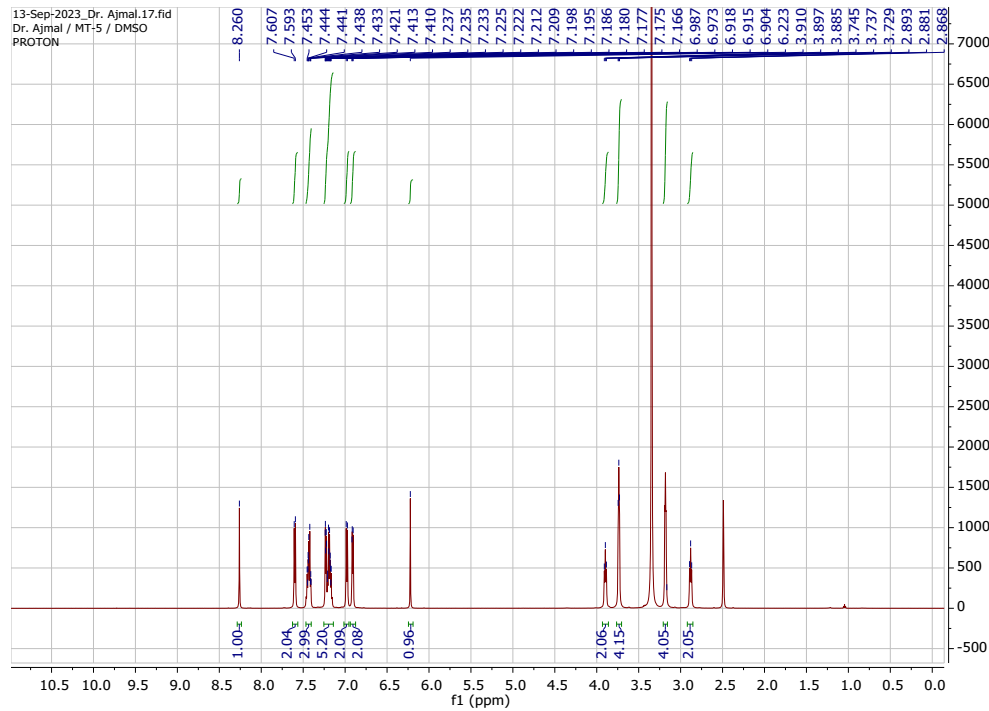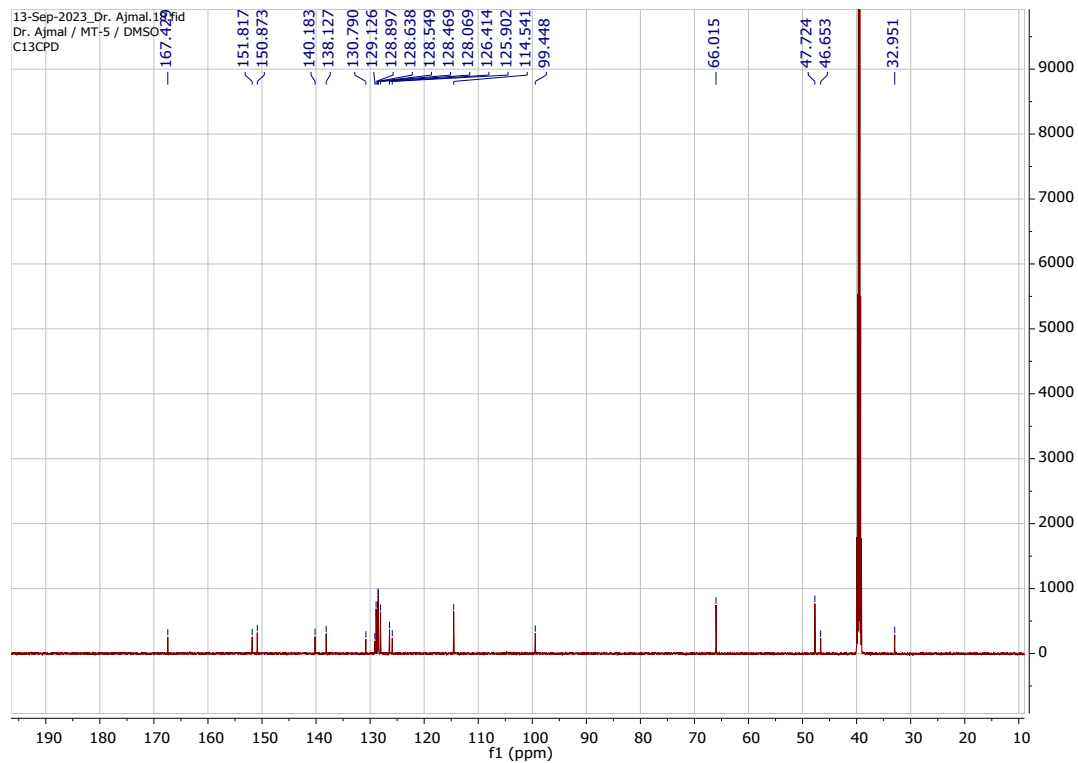

# <sup>1</sup>H NMR and <sup>13</sup>C NMR of 7:

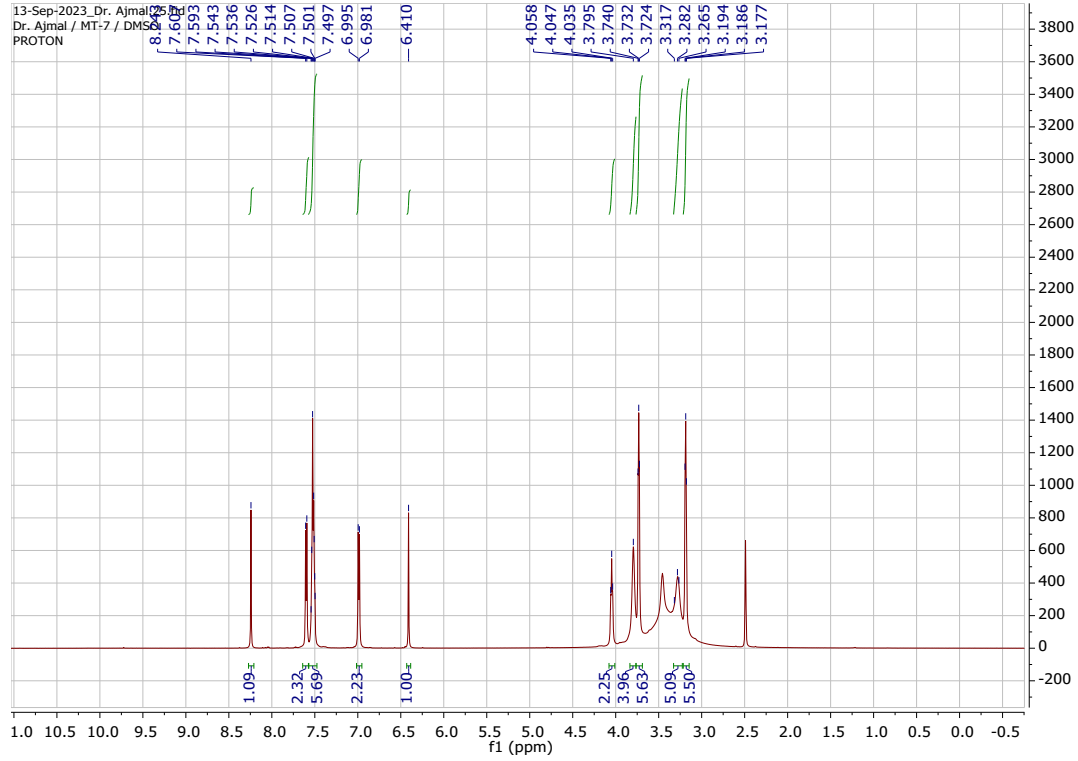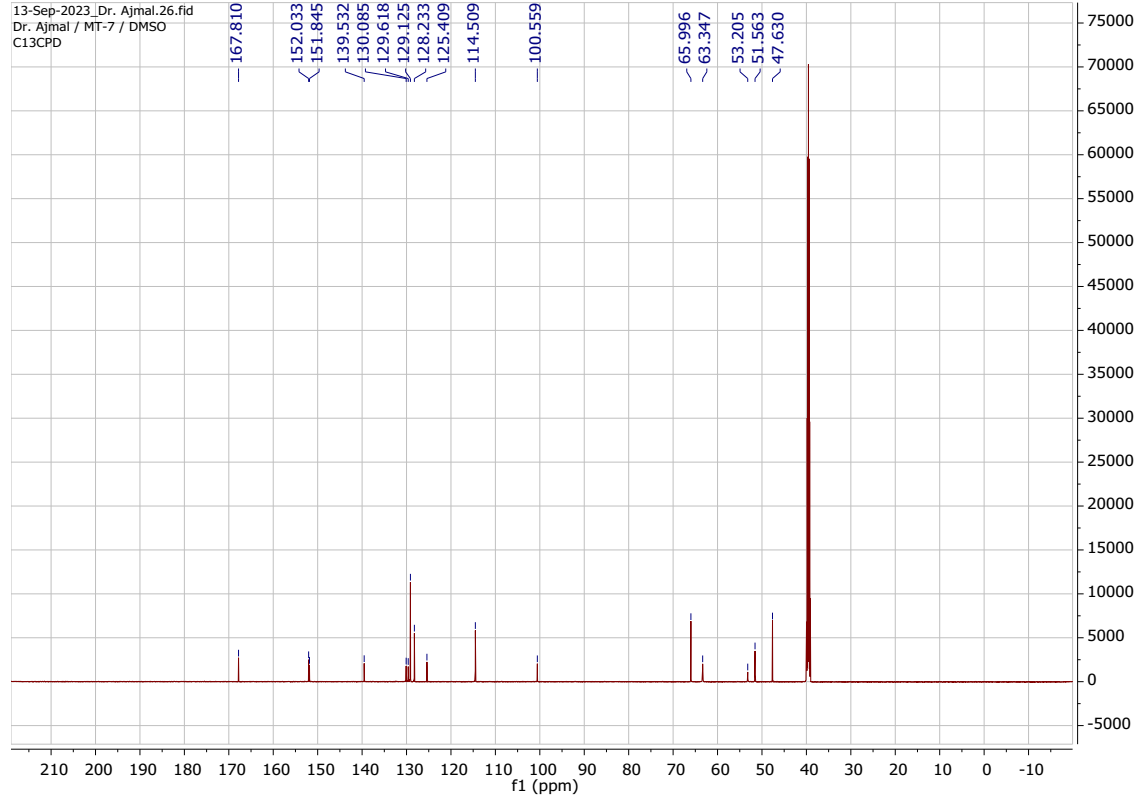

# <sup>1</sup>H NMR and <sup>13</sup>C NMR of 8:

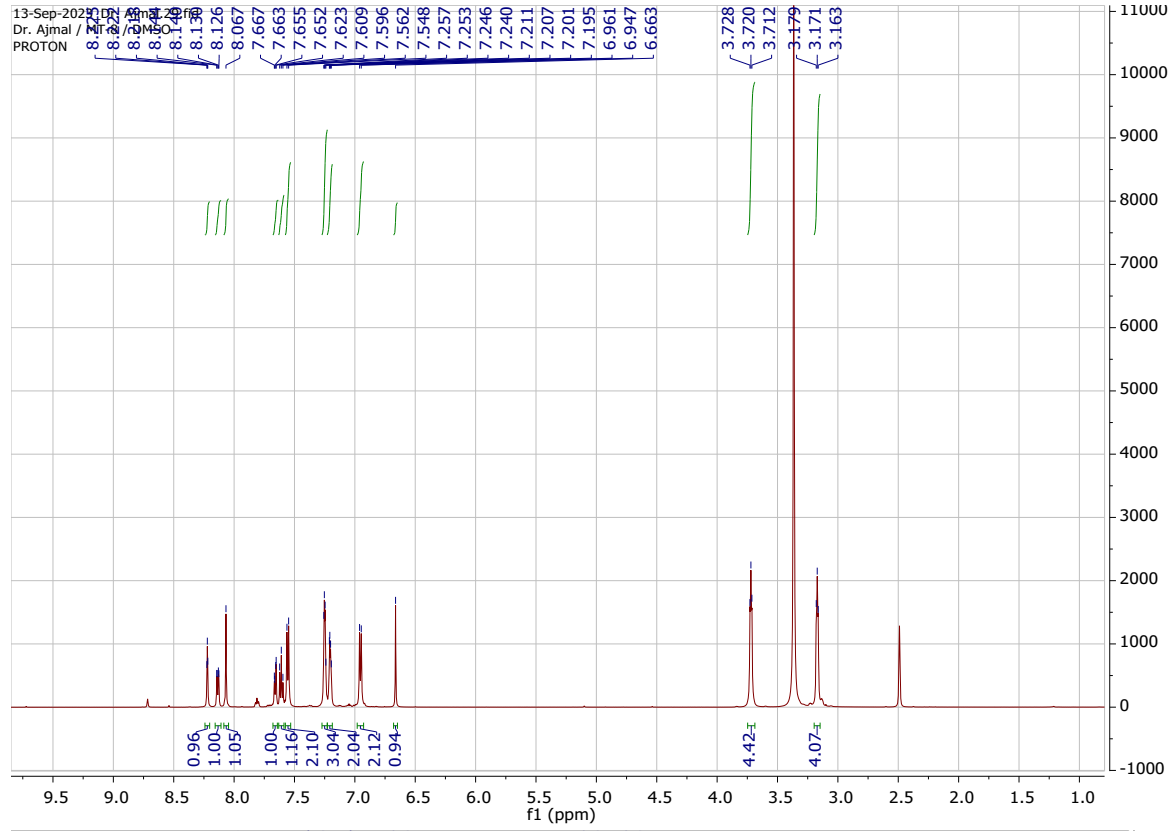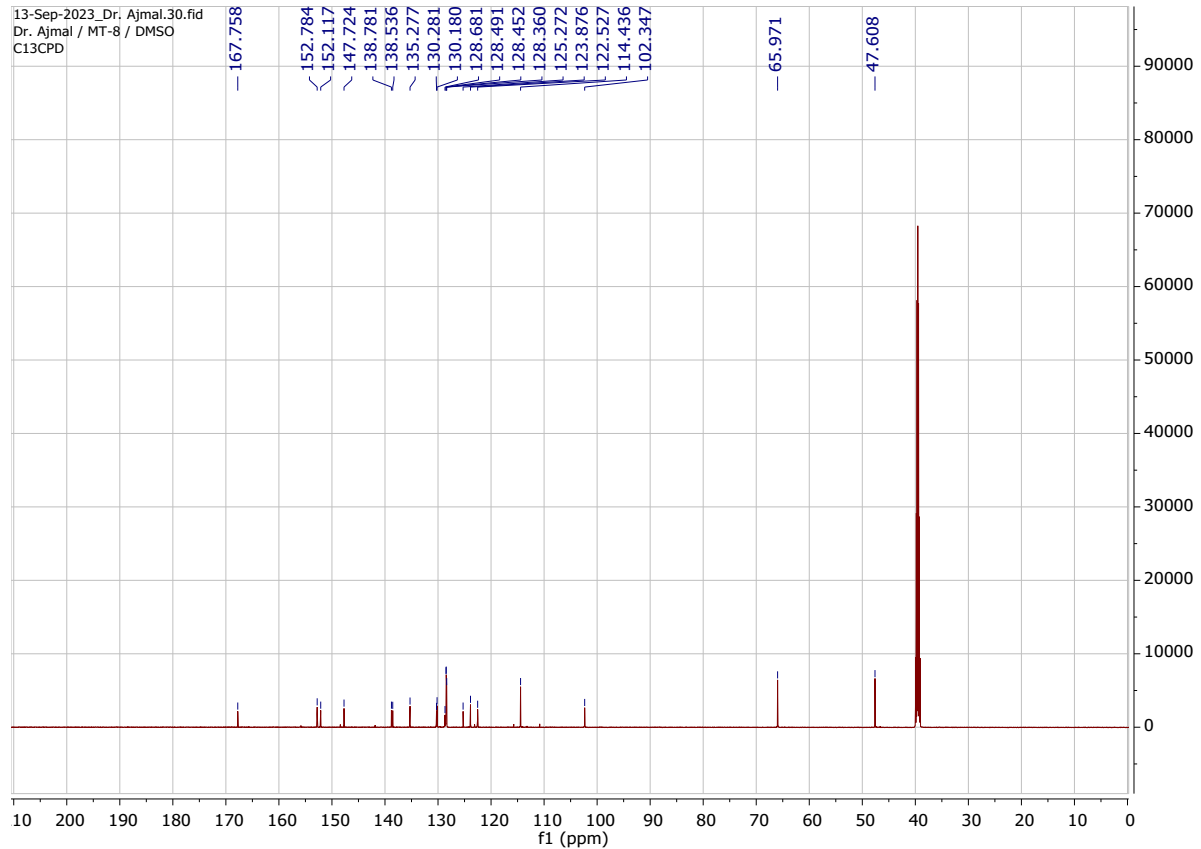

# <sup>1</sup>HNMR and <sup>13</sup>CNMR of 9: (MT-9)

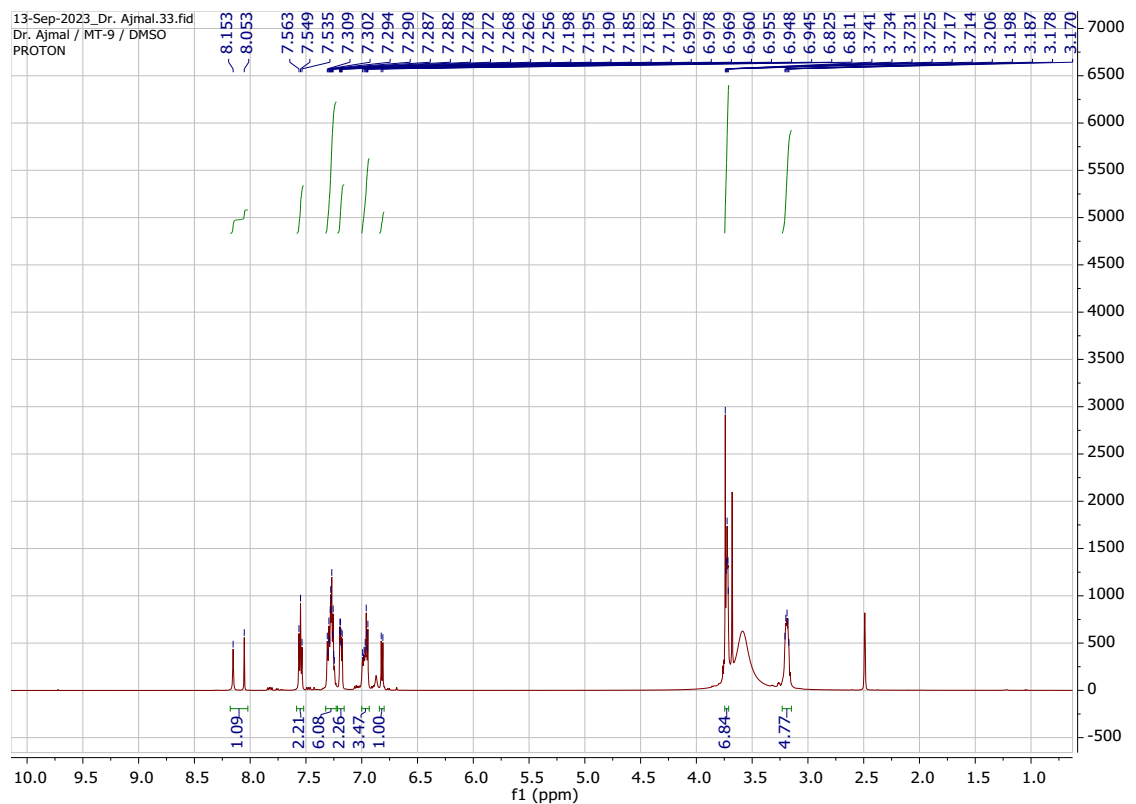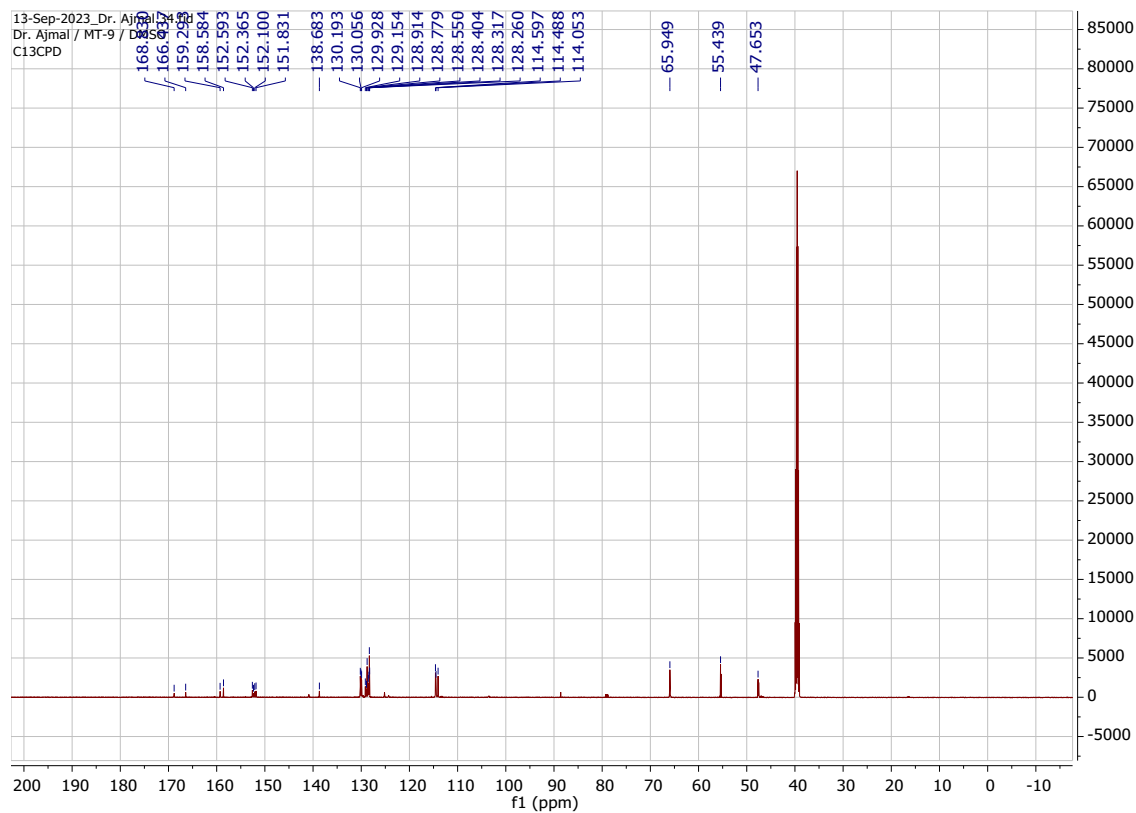

# <sup>1</sup>HNMR and <sup>13</sup>CNMR of 10:

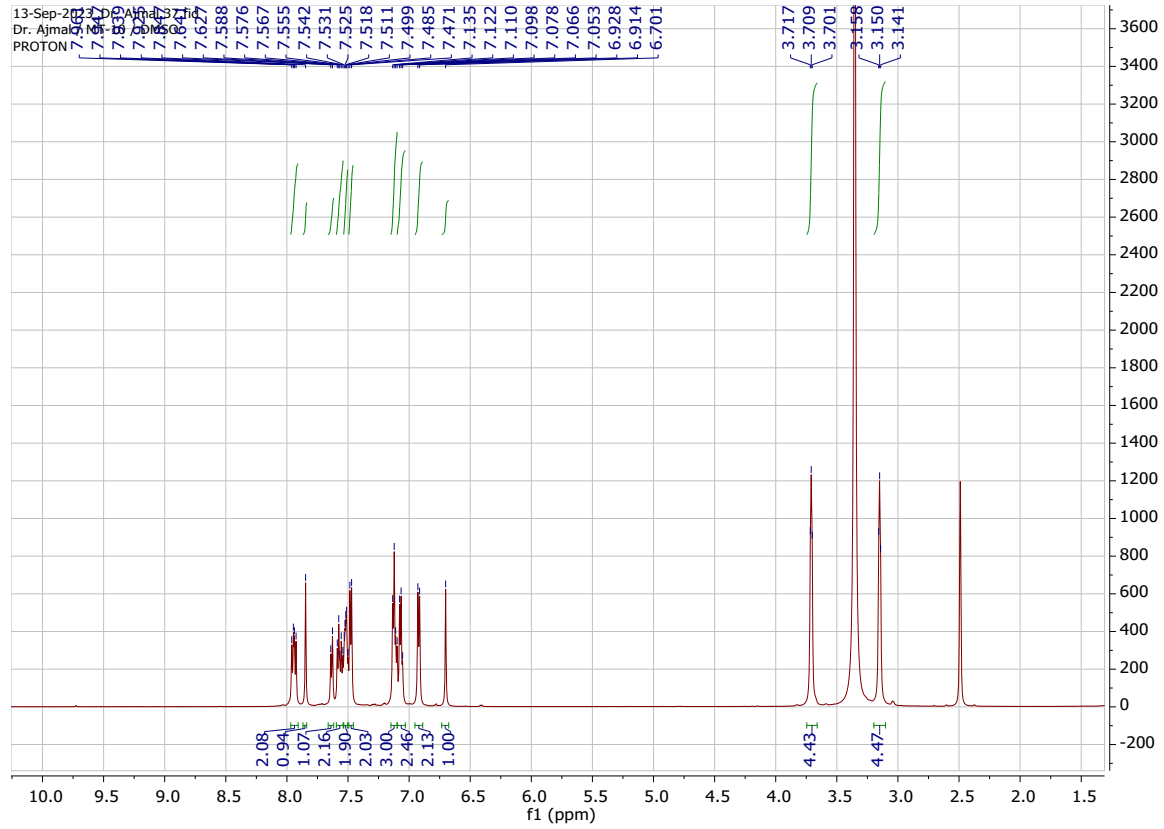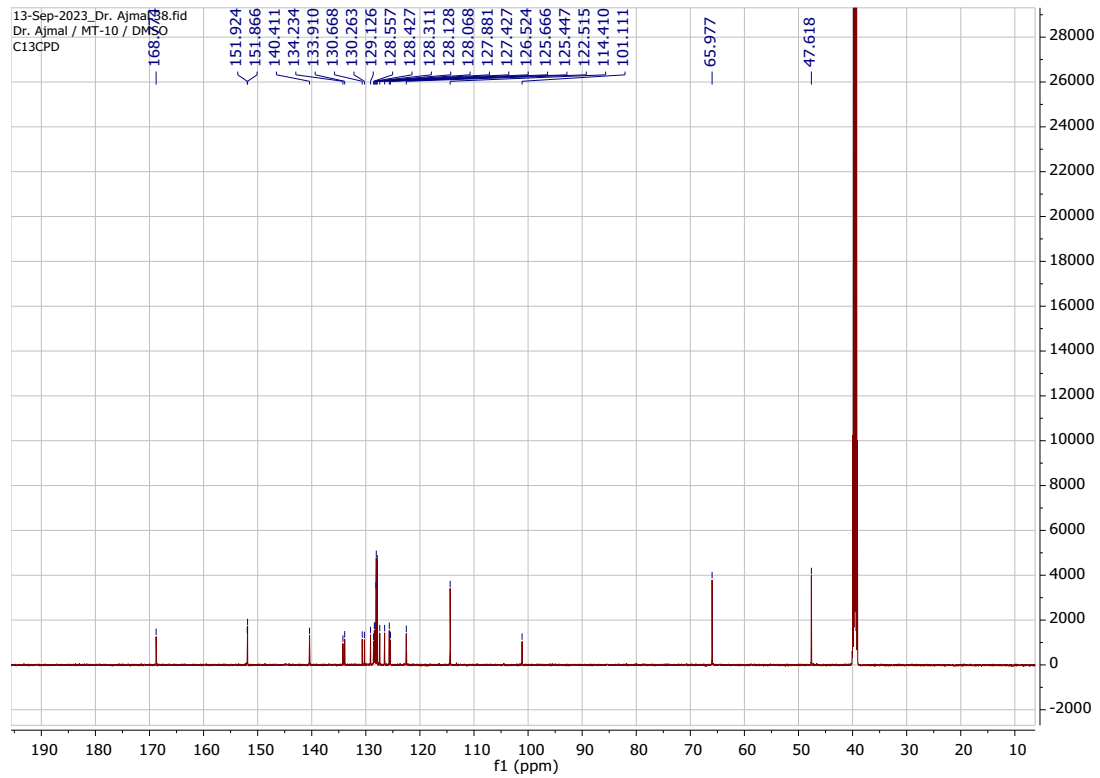



# HNMR and <sup>13</sup>CNMR of 11:

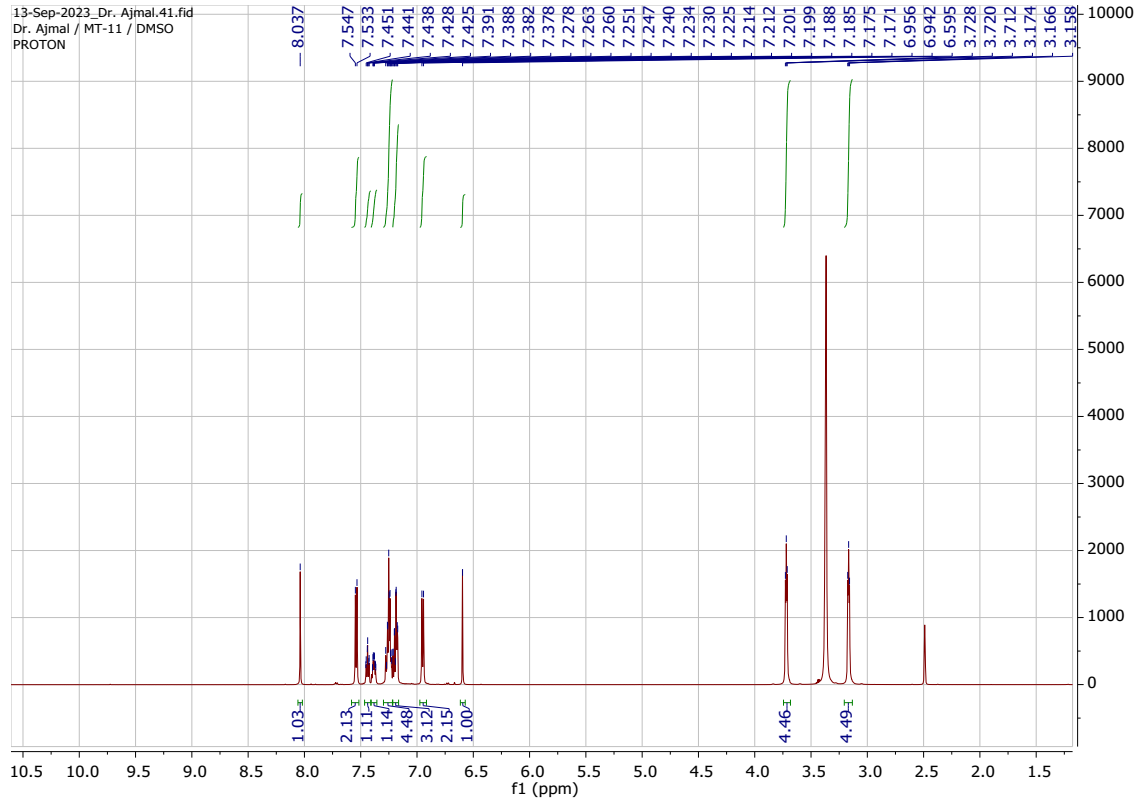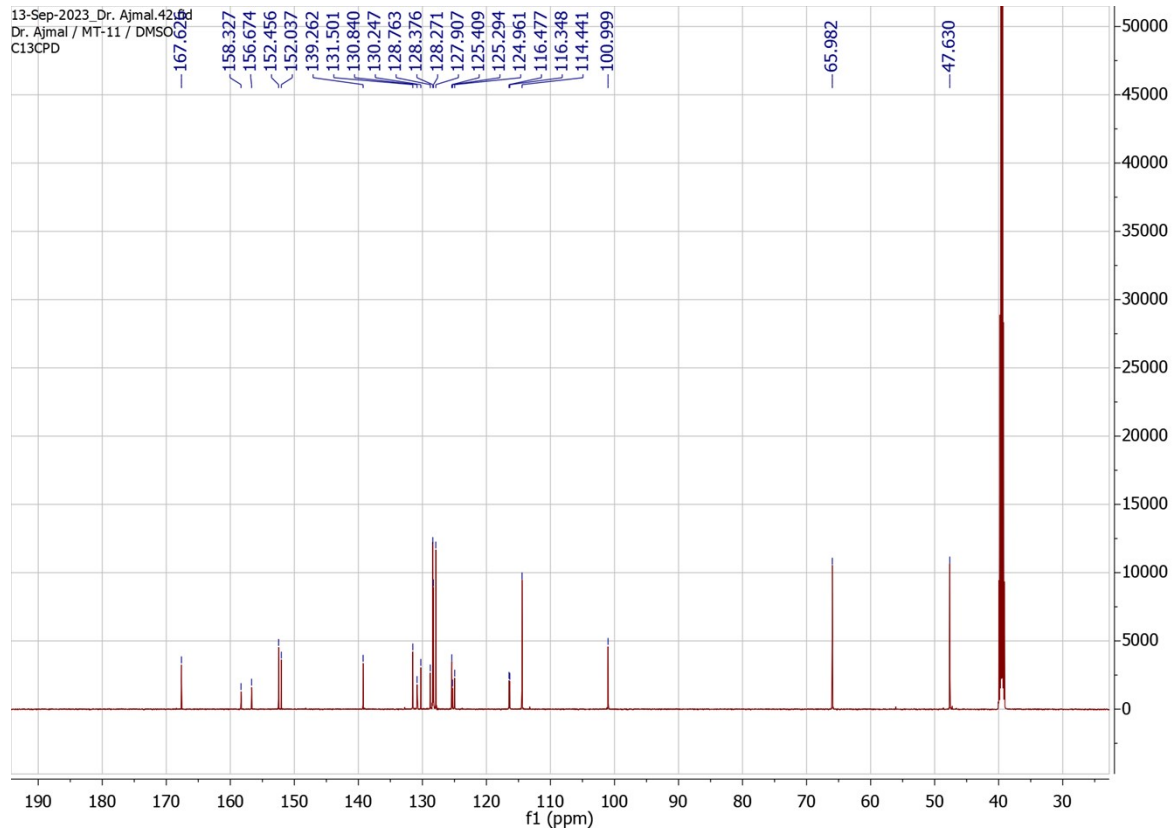

# <sup>1</sup>H NMR and <sup>13</sup>C NMR of 12:

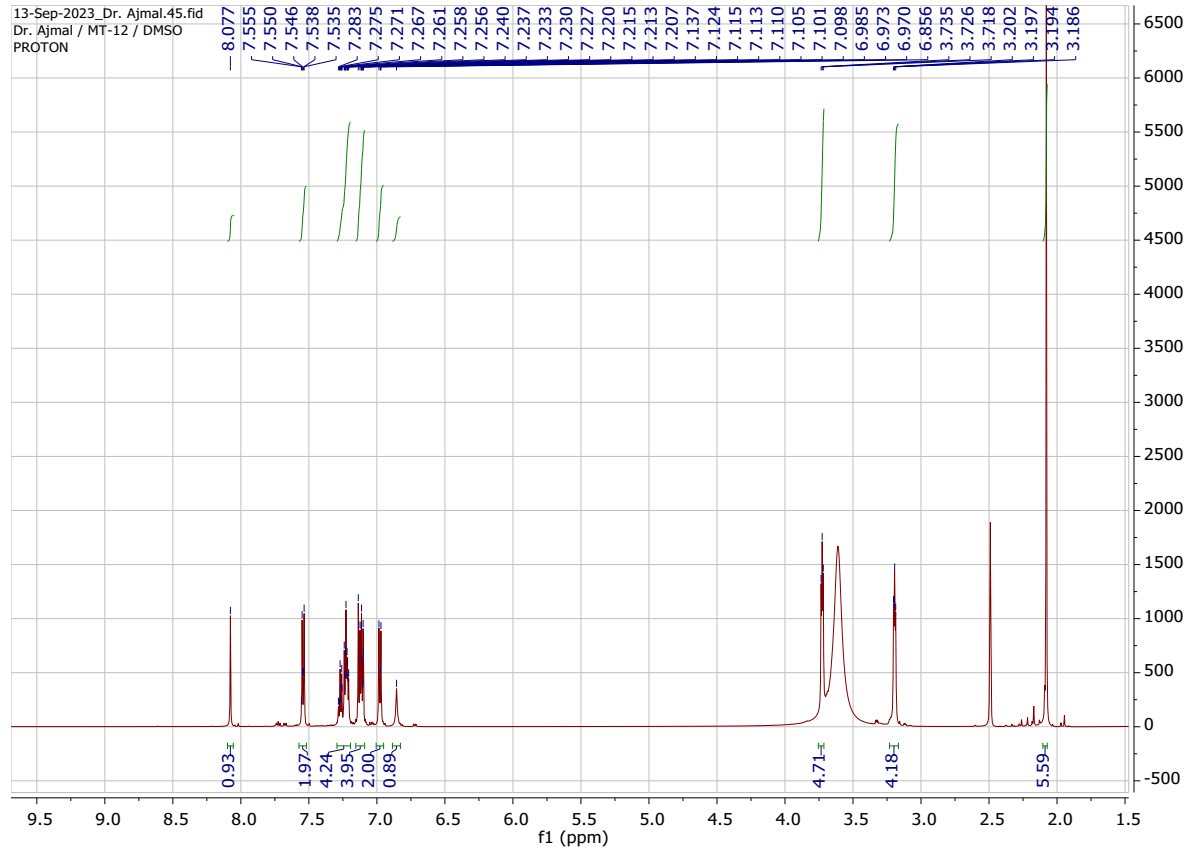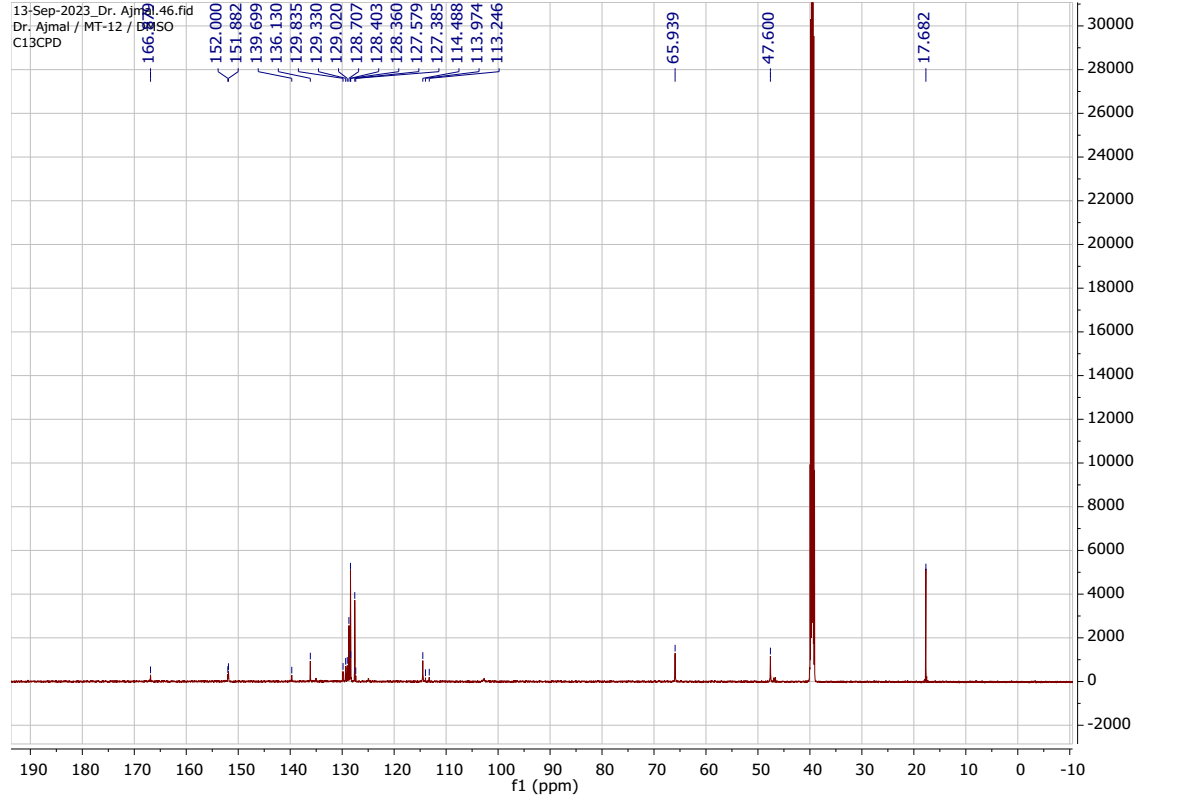

# <sup>1</sup>H NMR and <sup>13</sup>C NMR of 13:

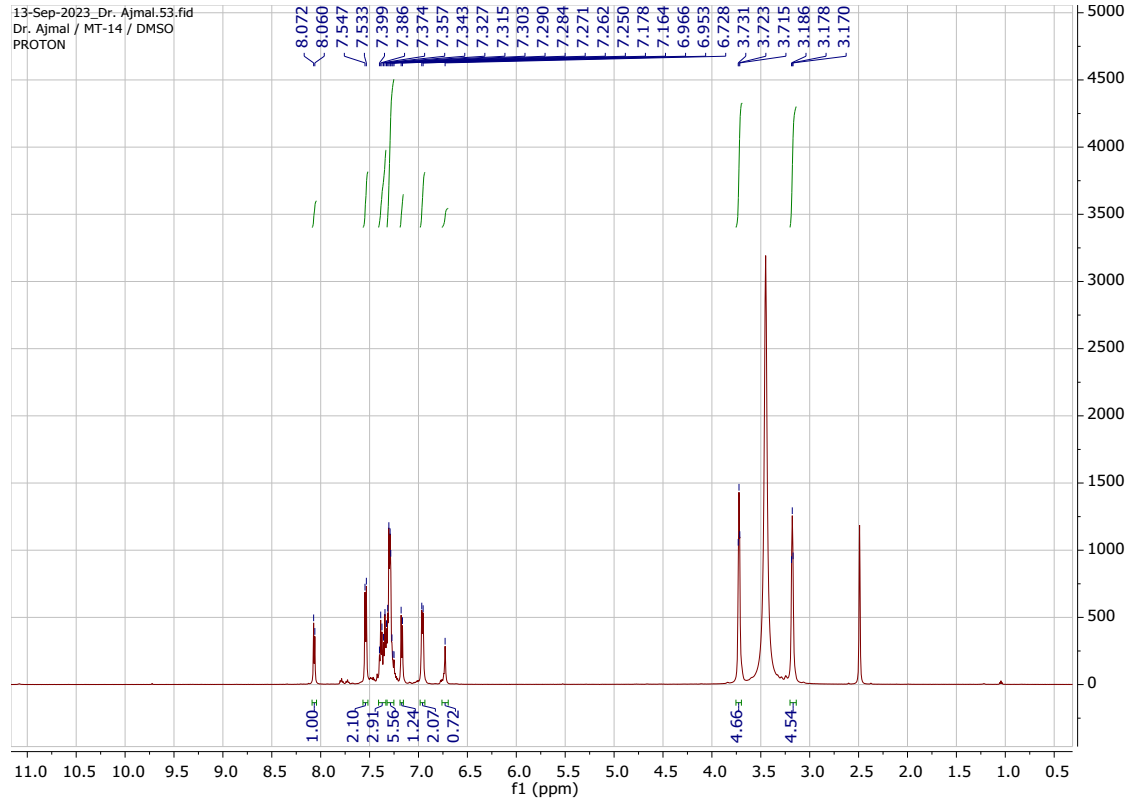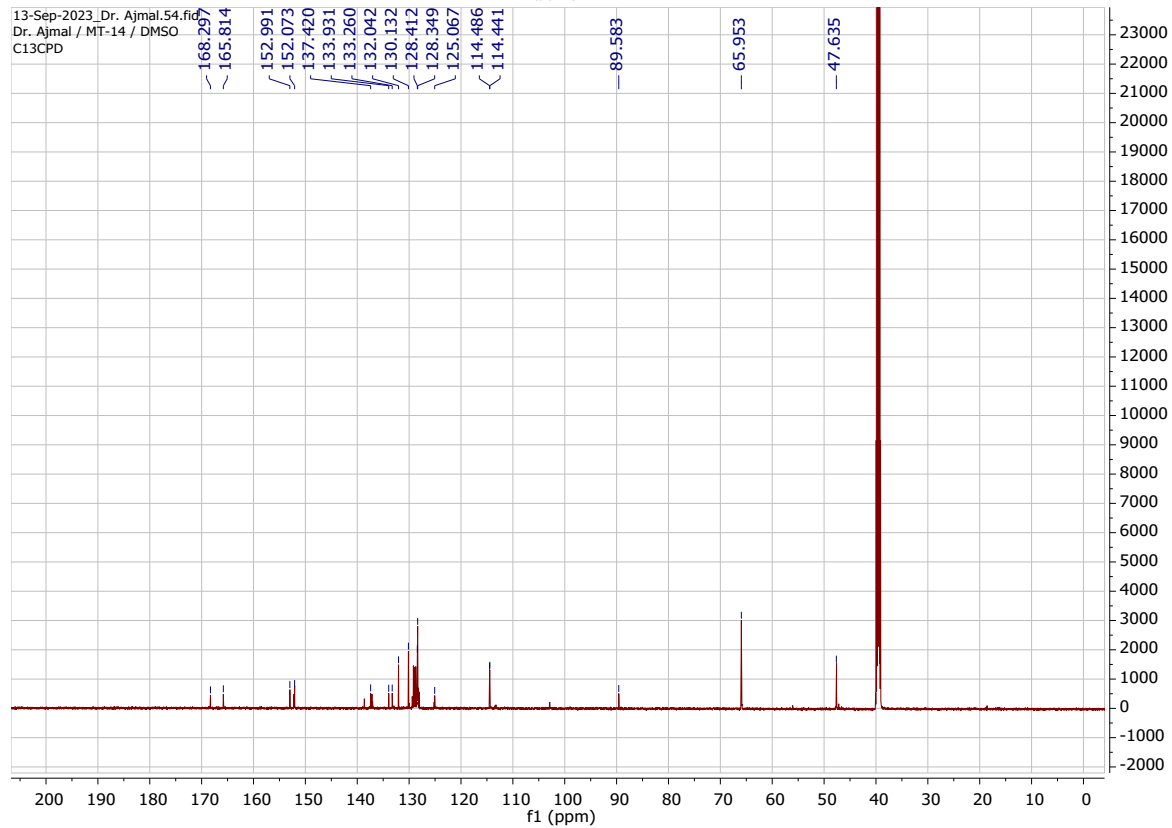

# <sup>1</sup>H NMR and <sup>13</sup>C NMR of 14:

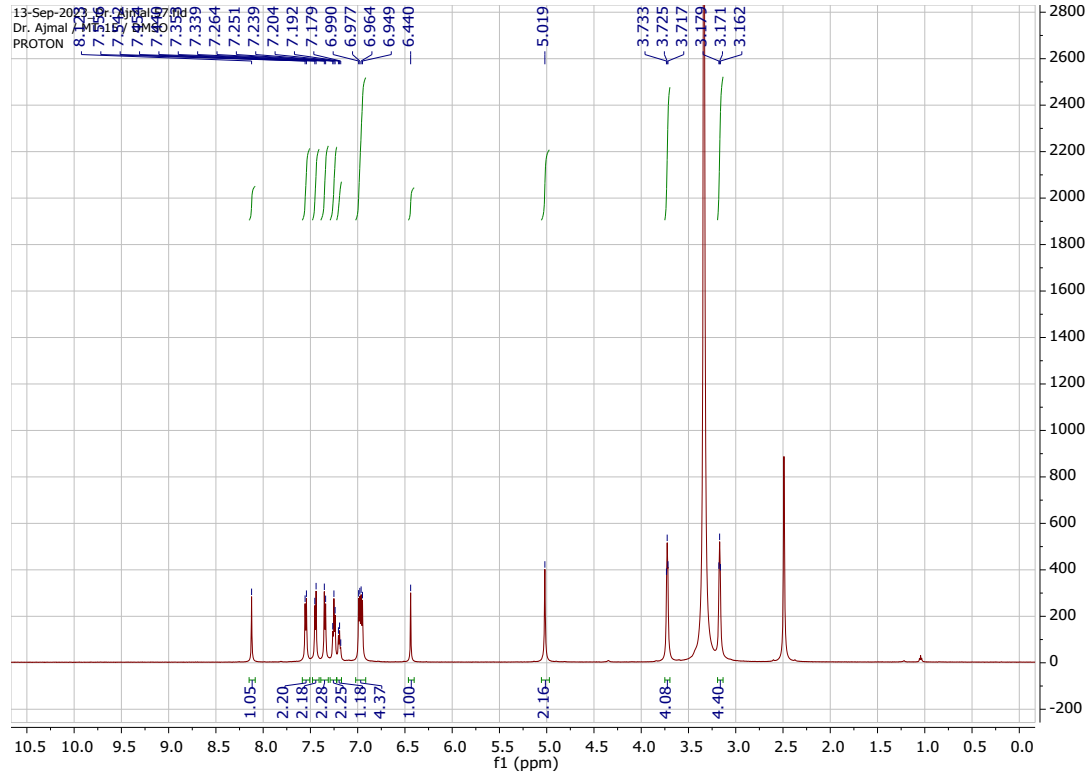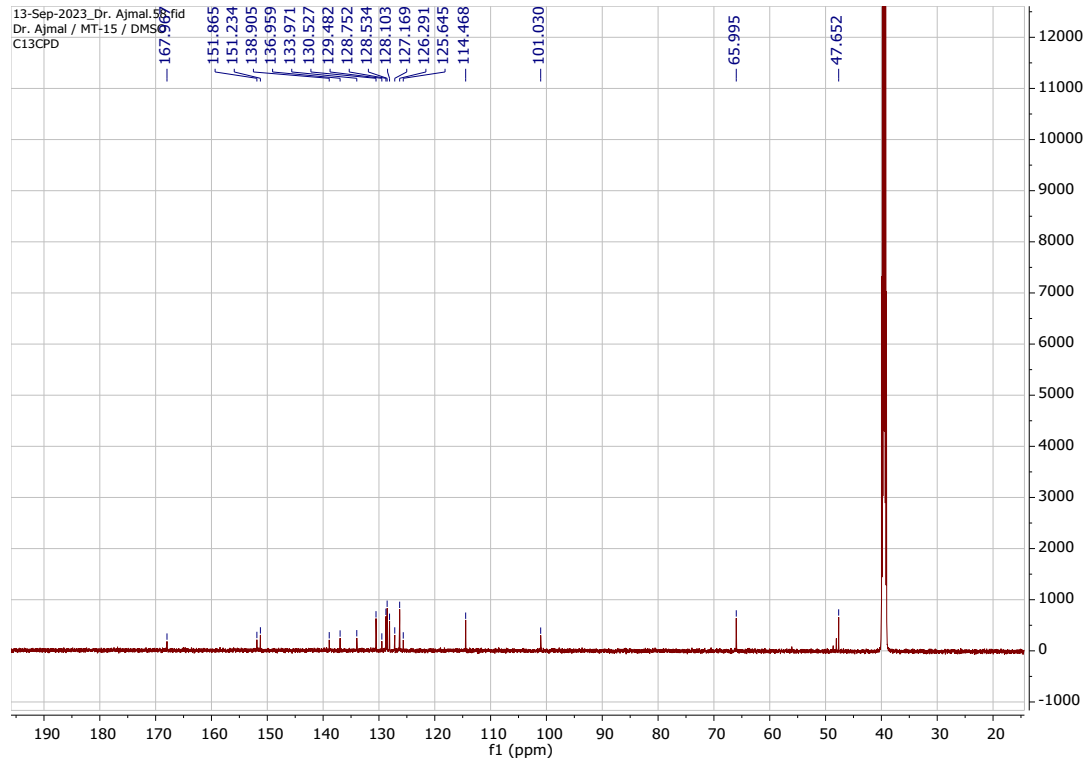

# <sup>1</sup>H NMR and <sup>13</sup>C NMR of 15:

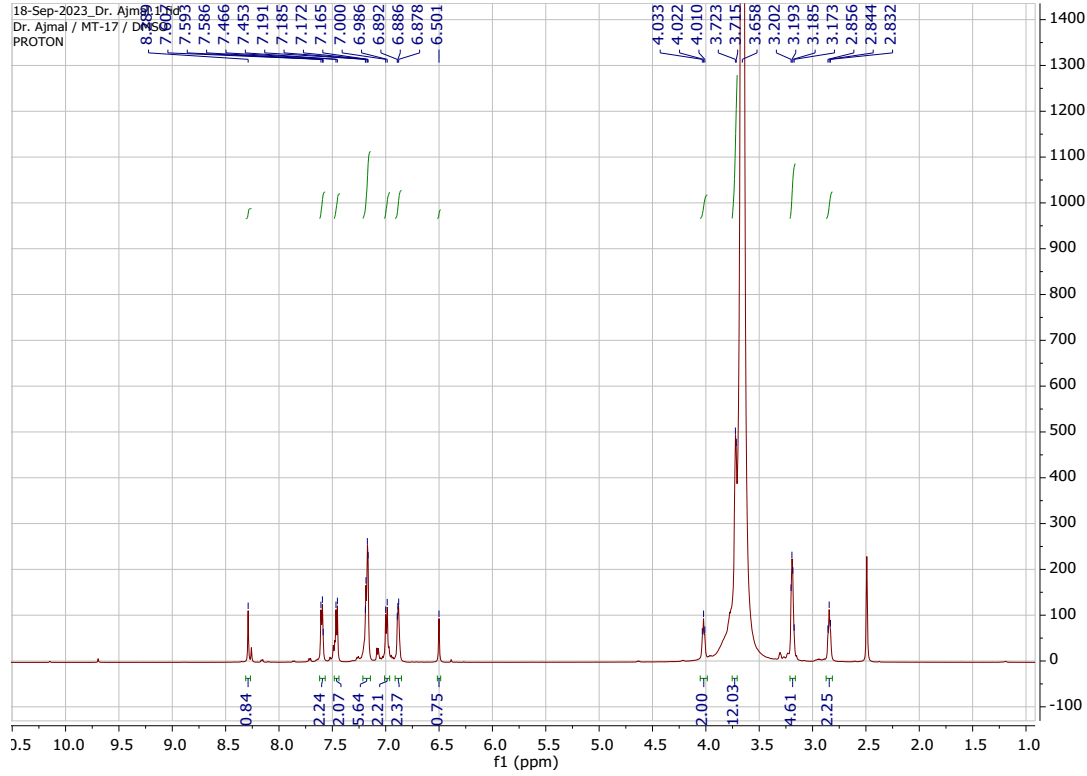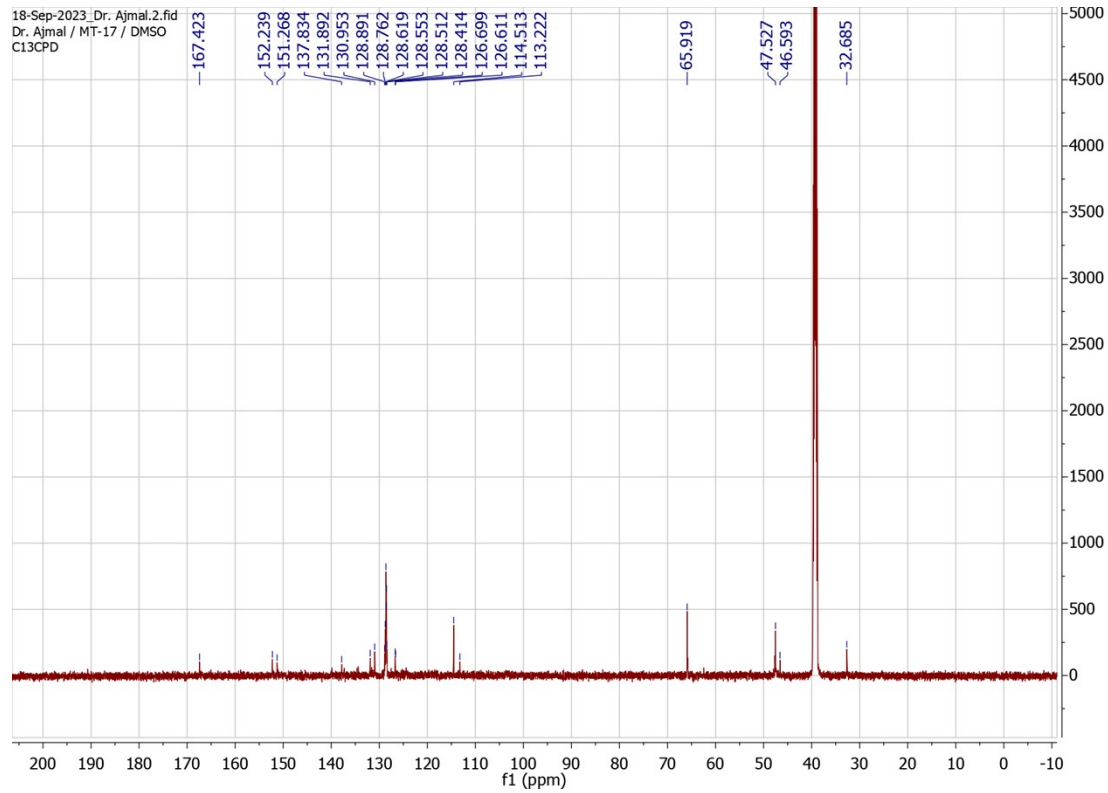

# <sup>1</sup>H NMR and <sup>13</sup>C NMR of 16:

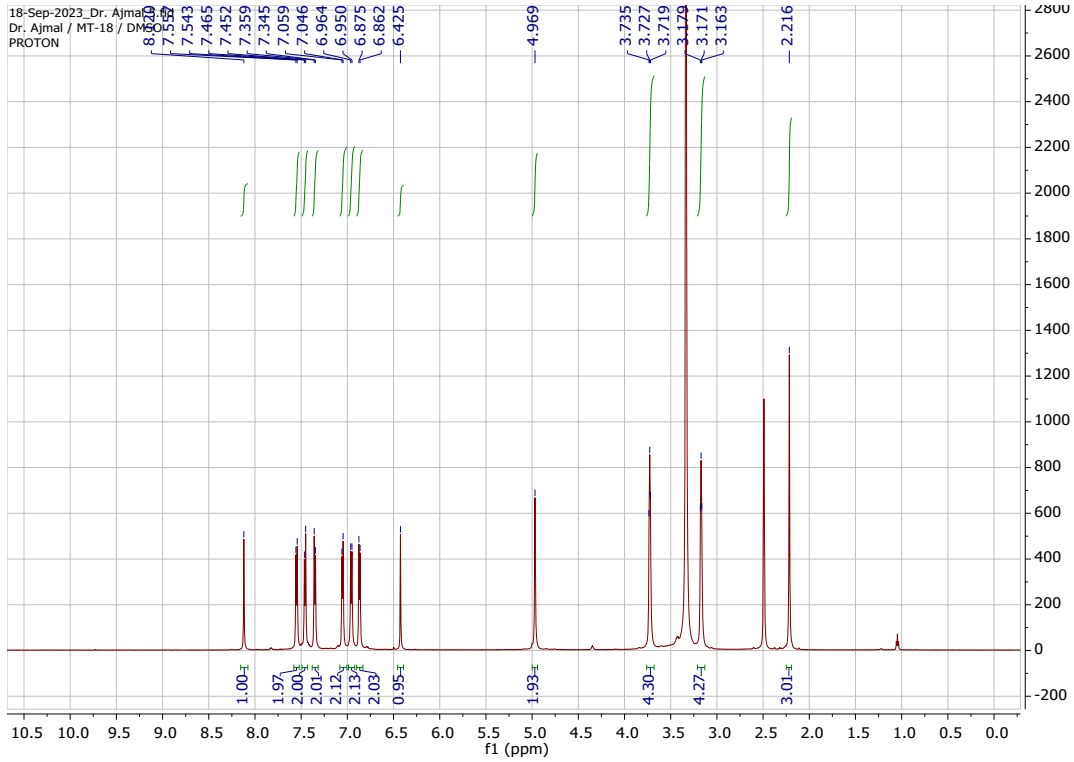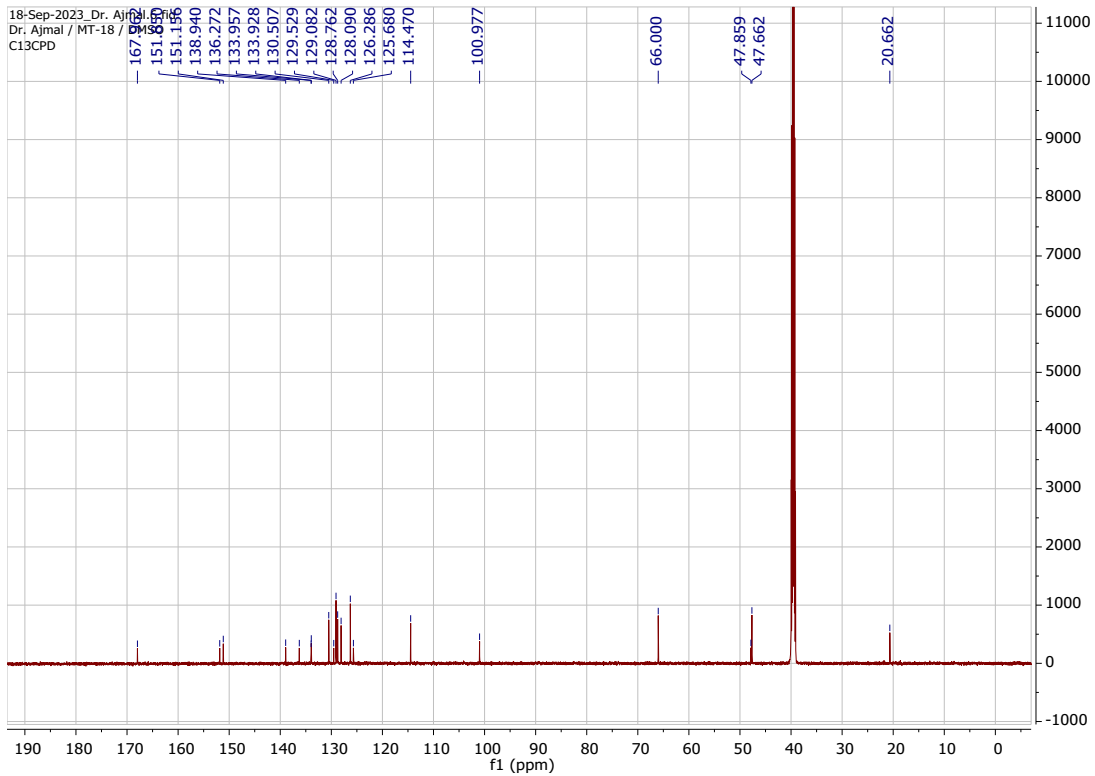

# <sup>1</sup>H NMR and <sup>13</sup>C NMR of 17:

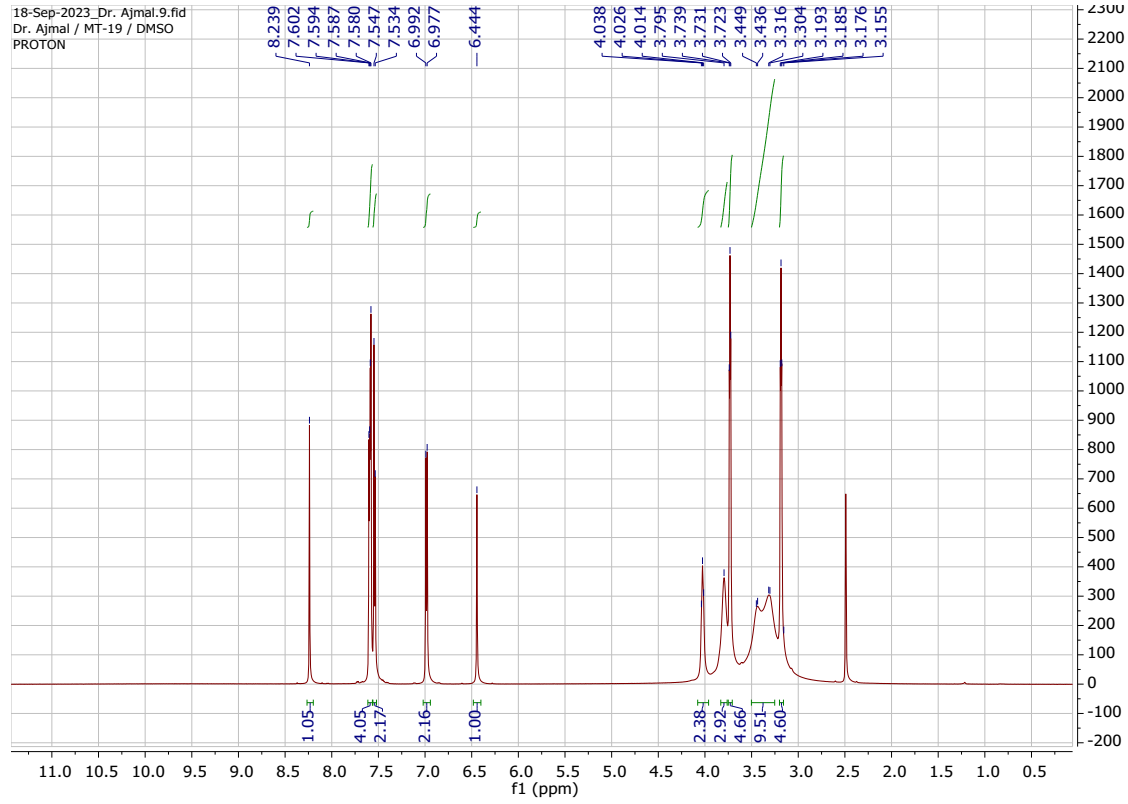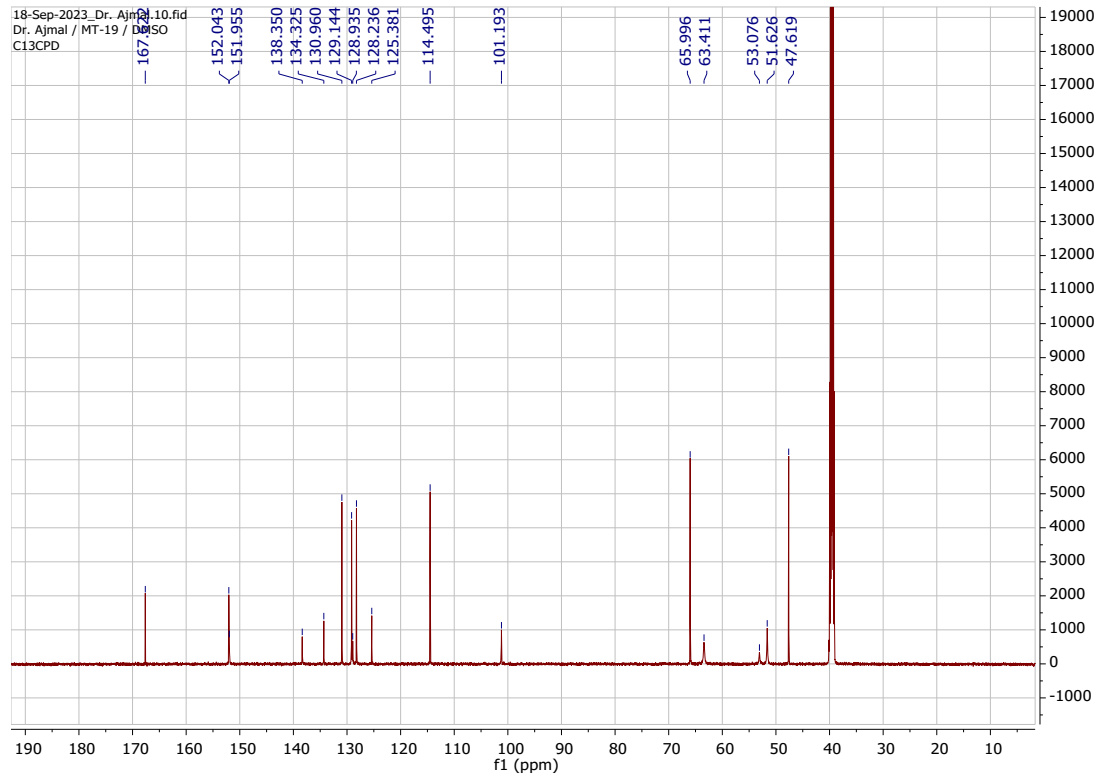

# <sup>1</sup>H NMR and <sup>13</sup>C NMR of 18:

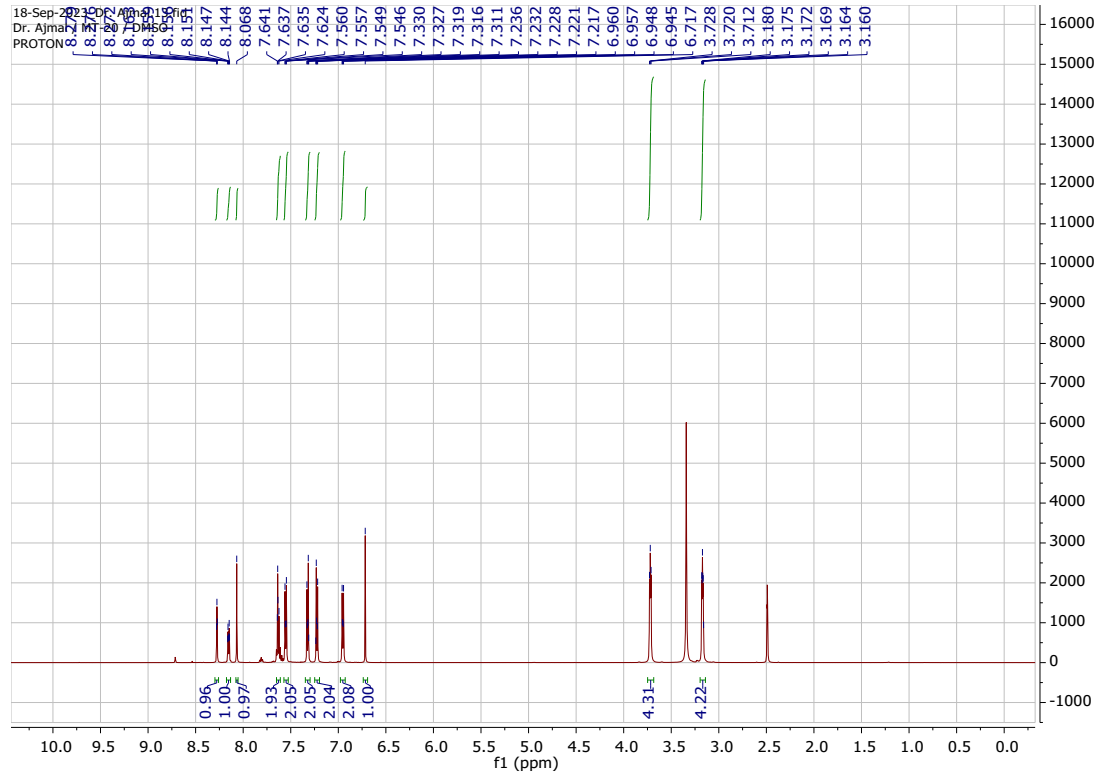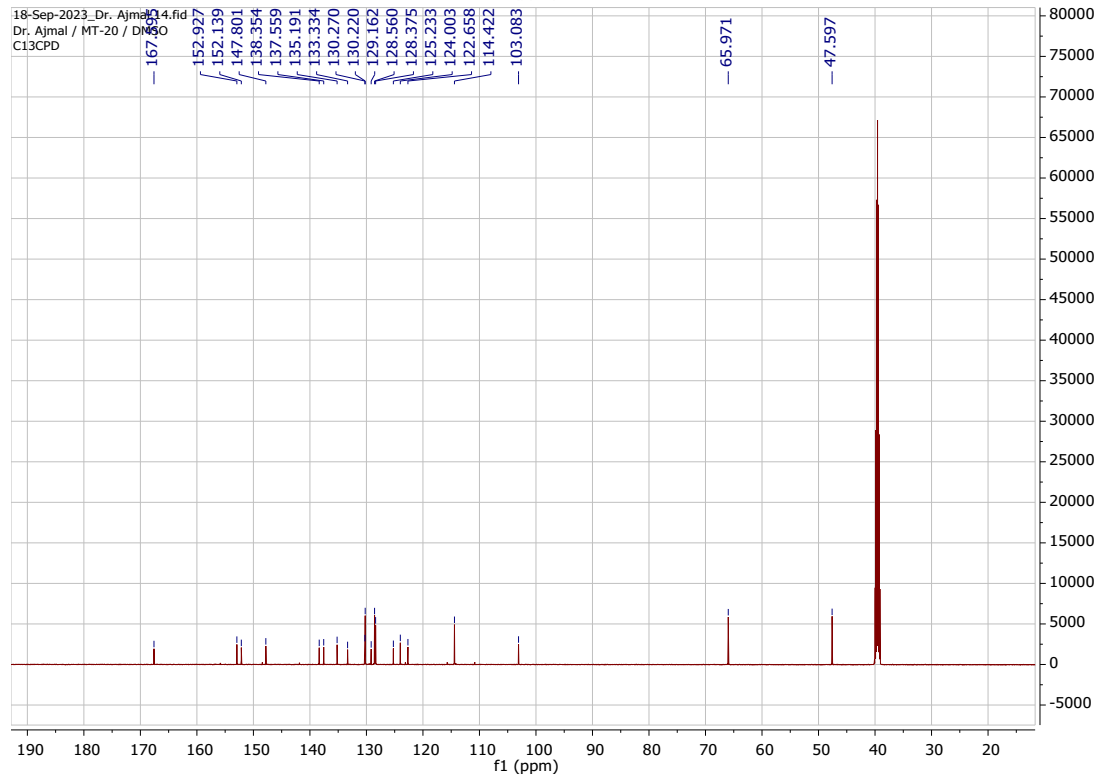



# <sup>1</sup>H NMR and <sup>13</sup>C NMR of 19:

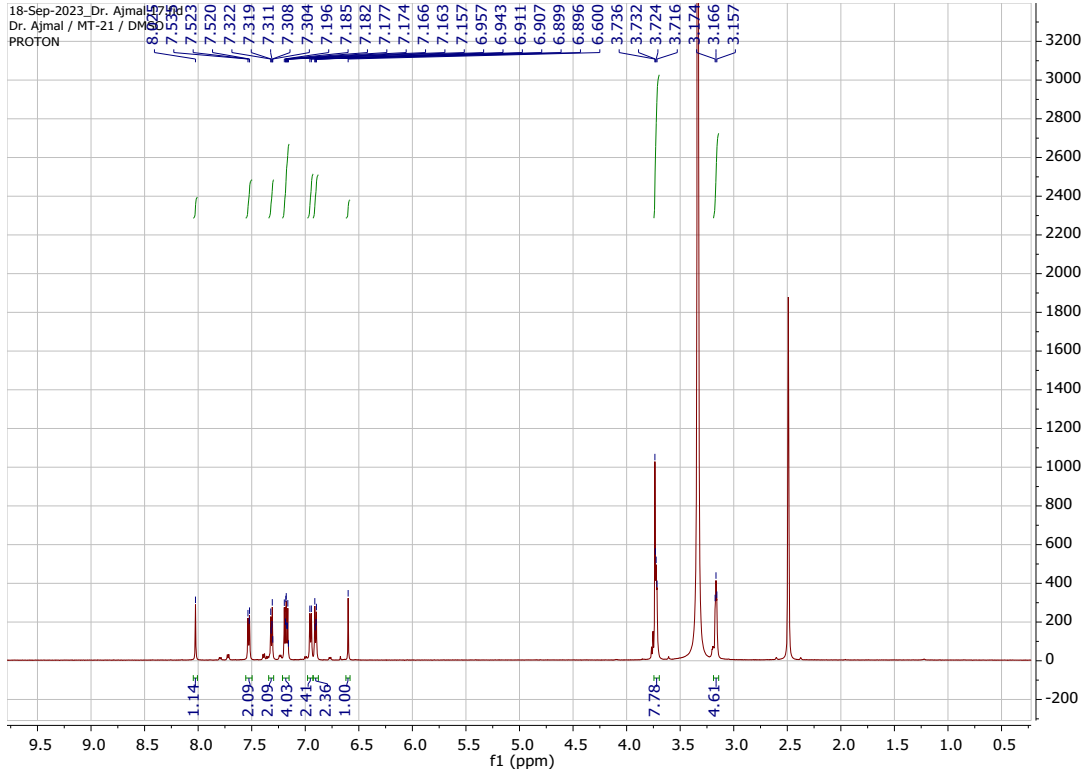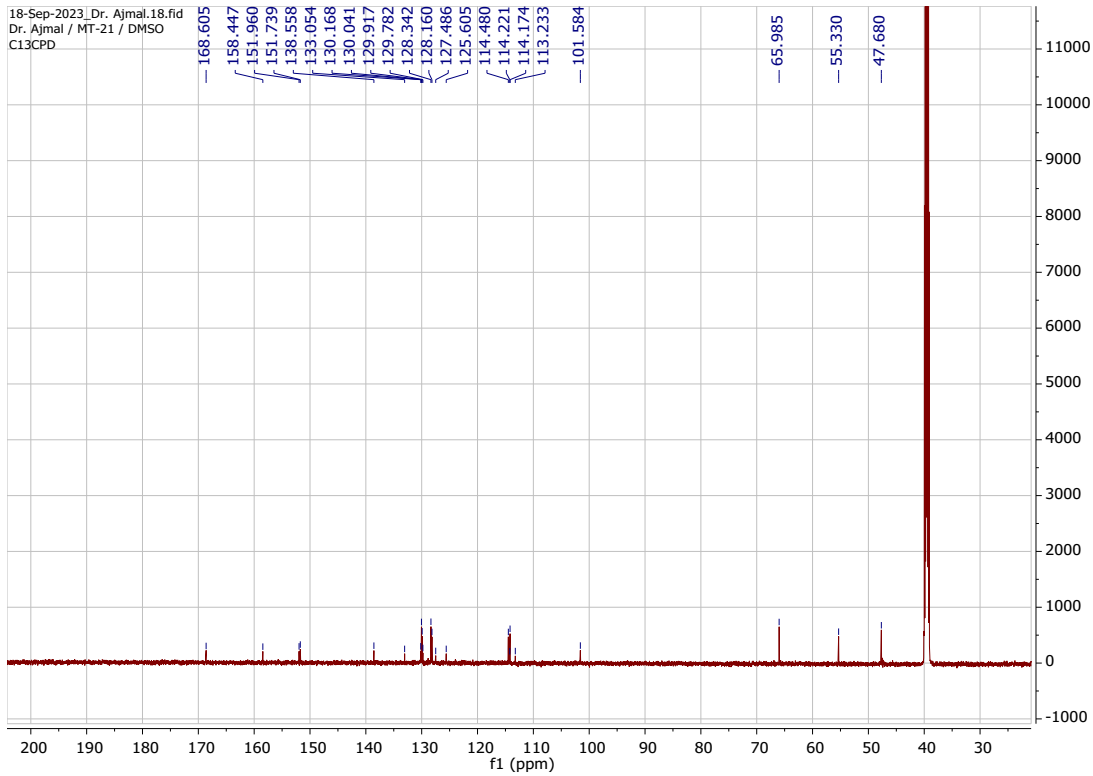

# <sup>1</sup>H NMR and <sup>13</sup>C NMR of 20:

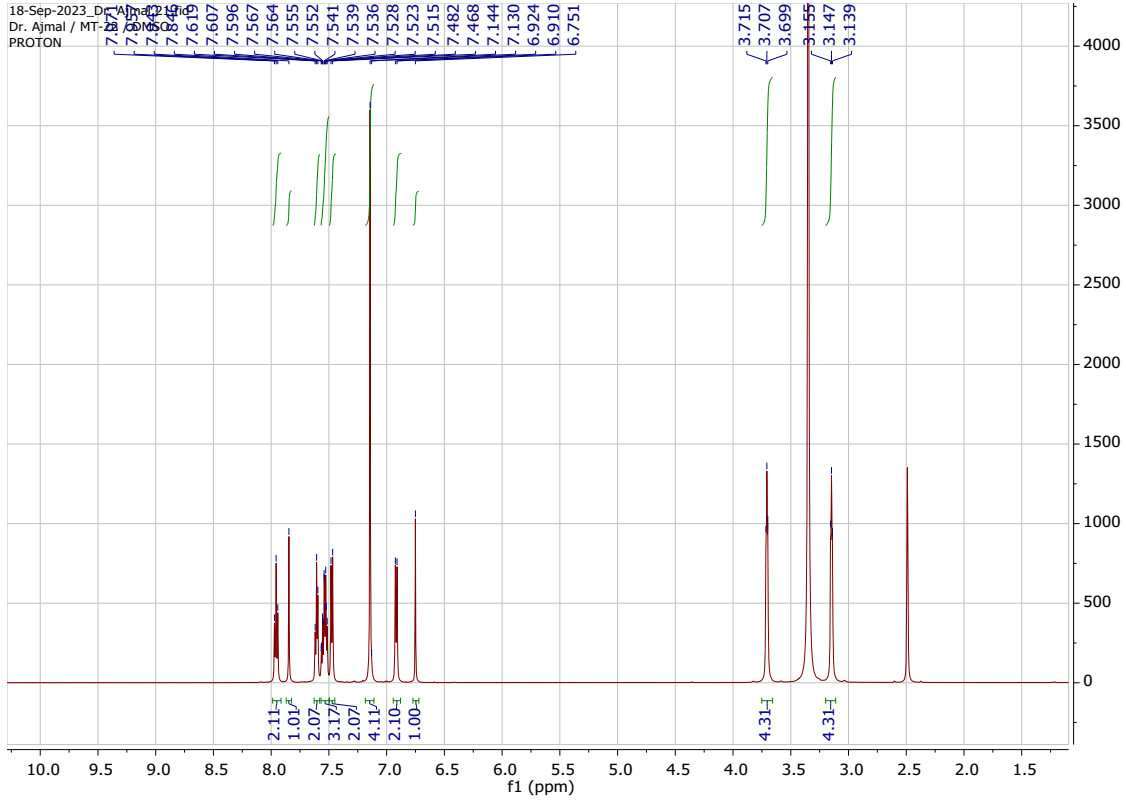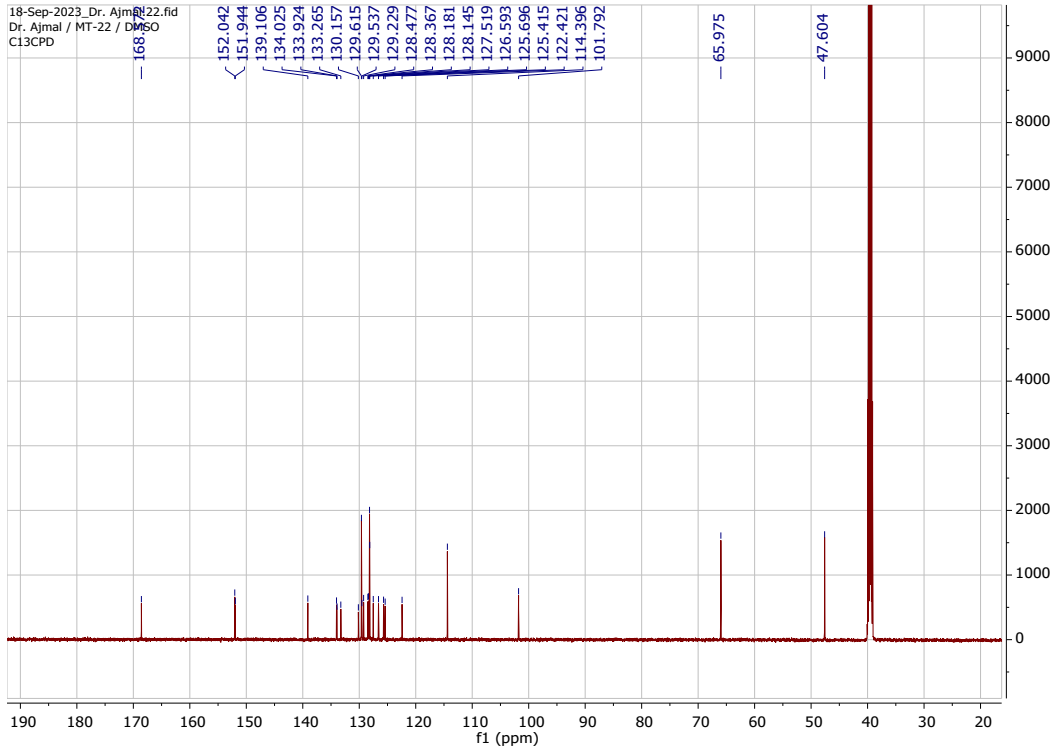

# <sup>1</sup>H NMR and <sup>13</sup>C NMR of 21:

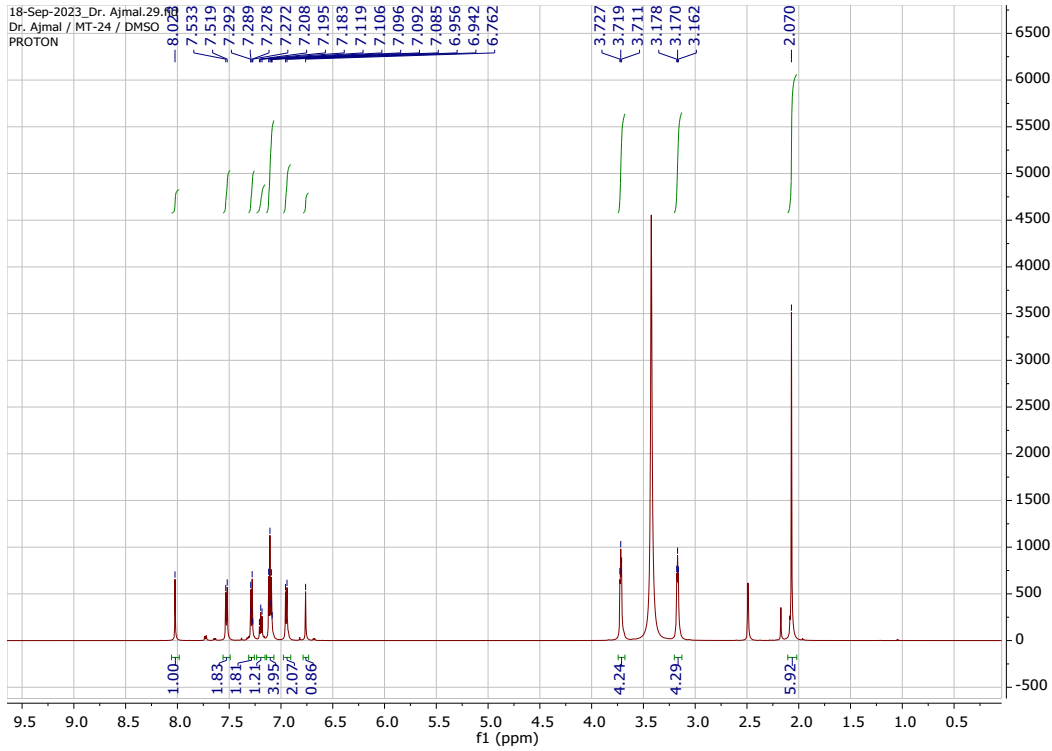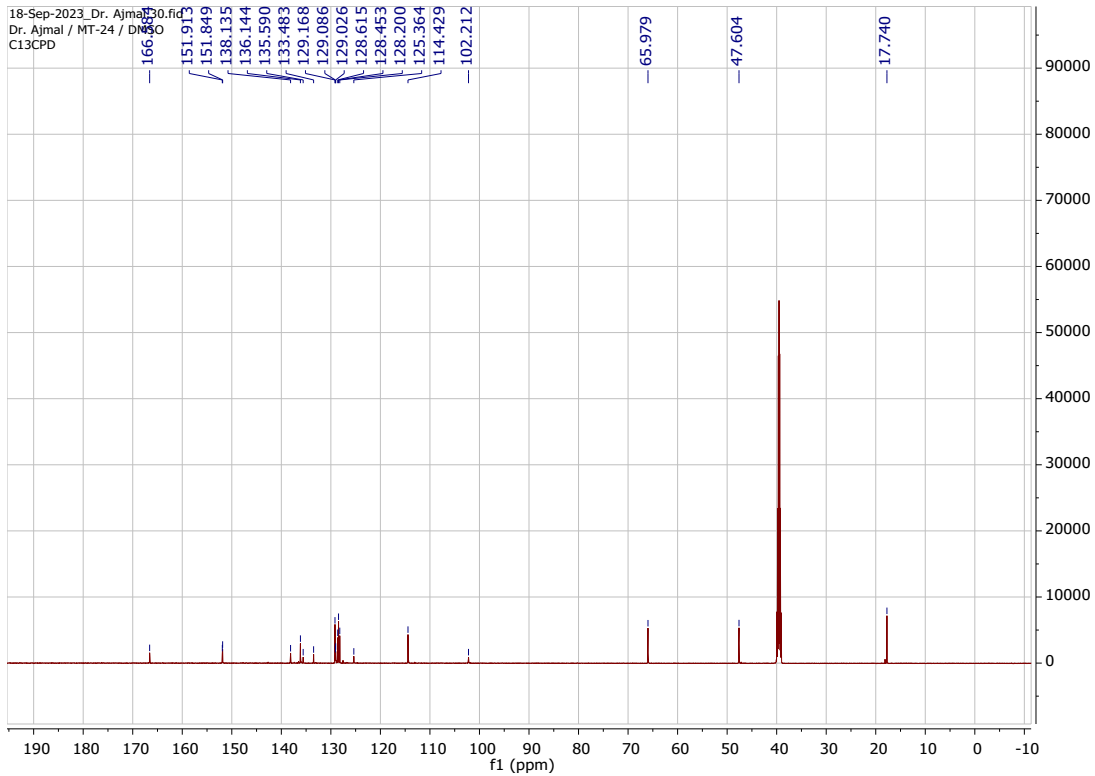

# <sup>1</sup>H NMR and <sup>13</sup>C NMR of 22

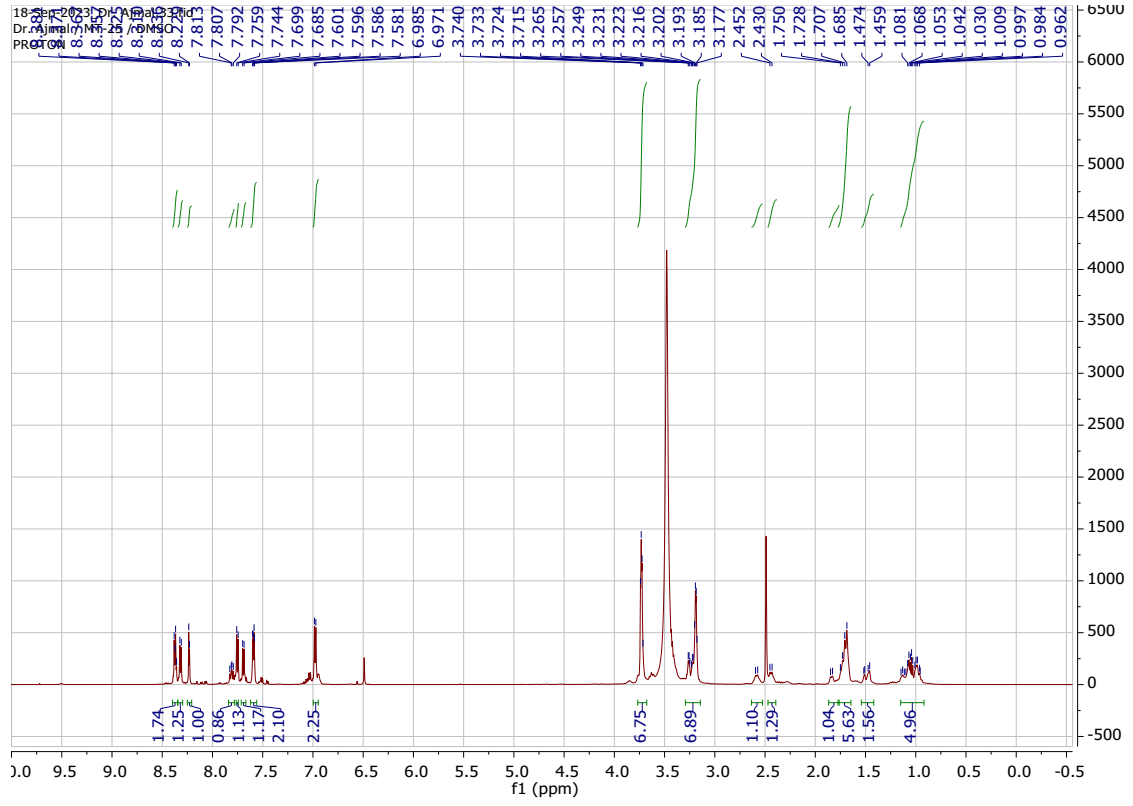

# <sup>1</sup>H NMR and <sup>13</sup>C NMR of 23:

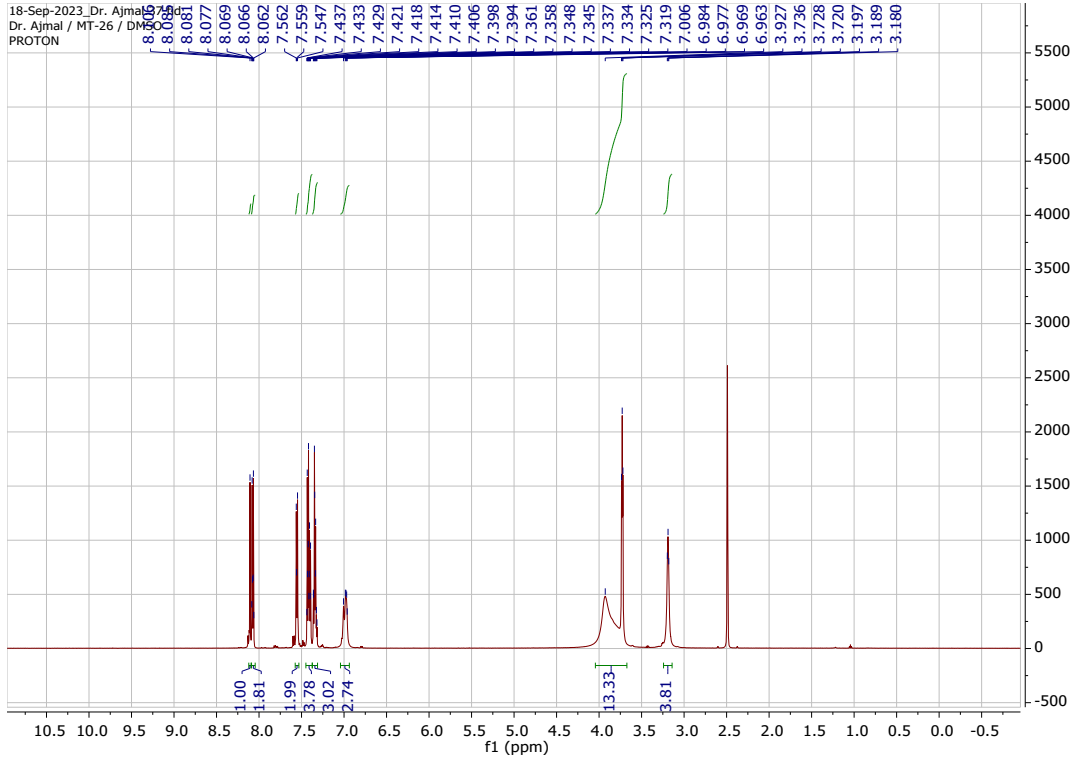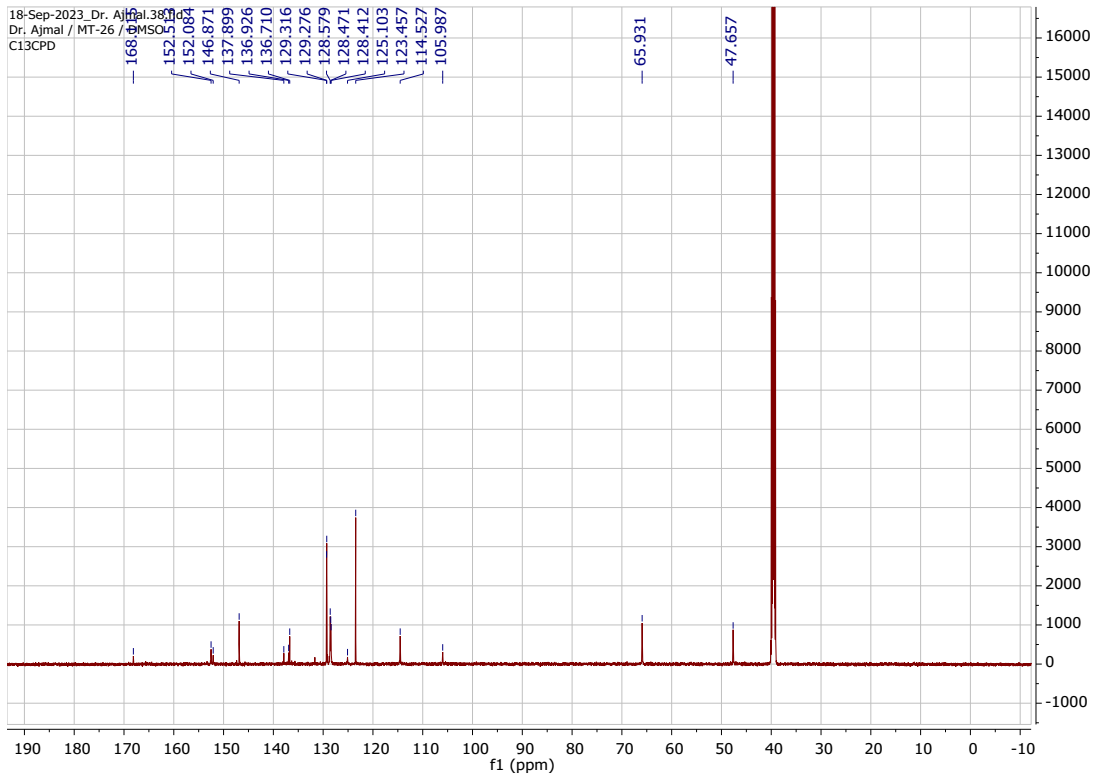

# <sup>1</sup>H NMR and <sup>13</sup>C NMR of 24:

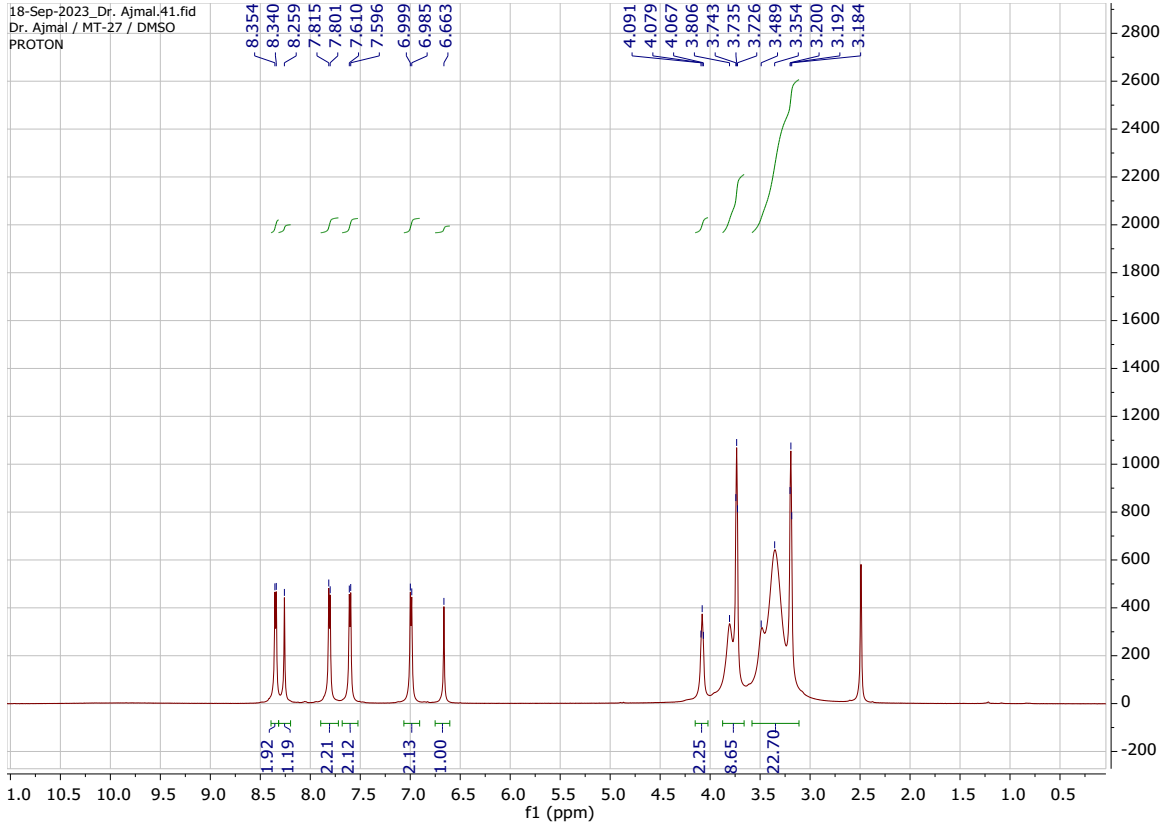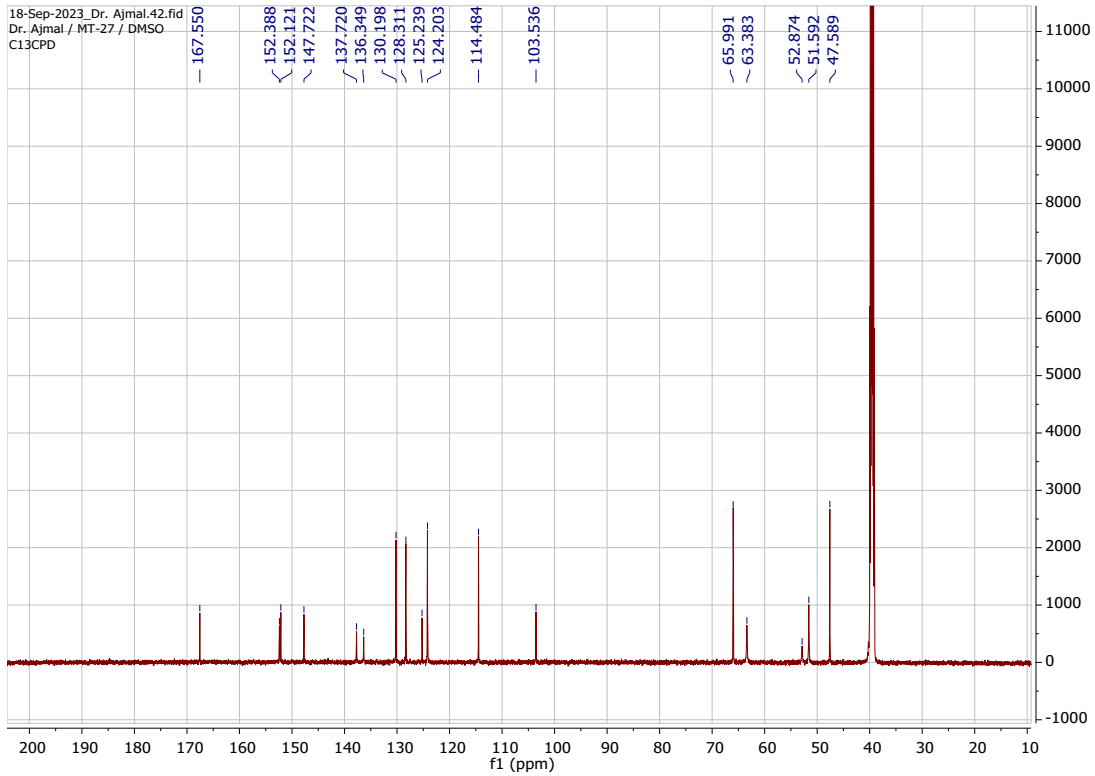

# <sup>1</sup>H NMR and <sup>13</sup>C NMR of 25:

18-Sep-2023\_Dr. Ajmal.45.fid  
Dr. Ajmal / MT-28 / DMSO  
PROTON

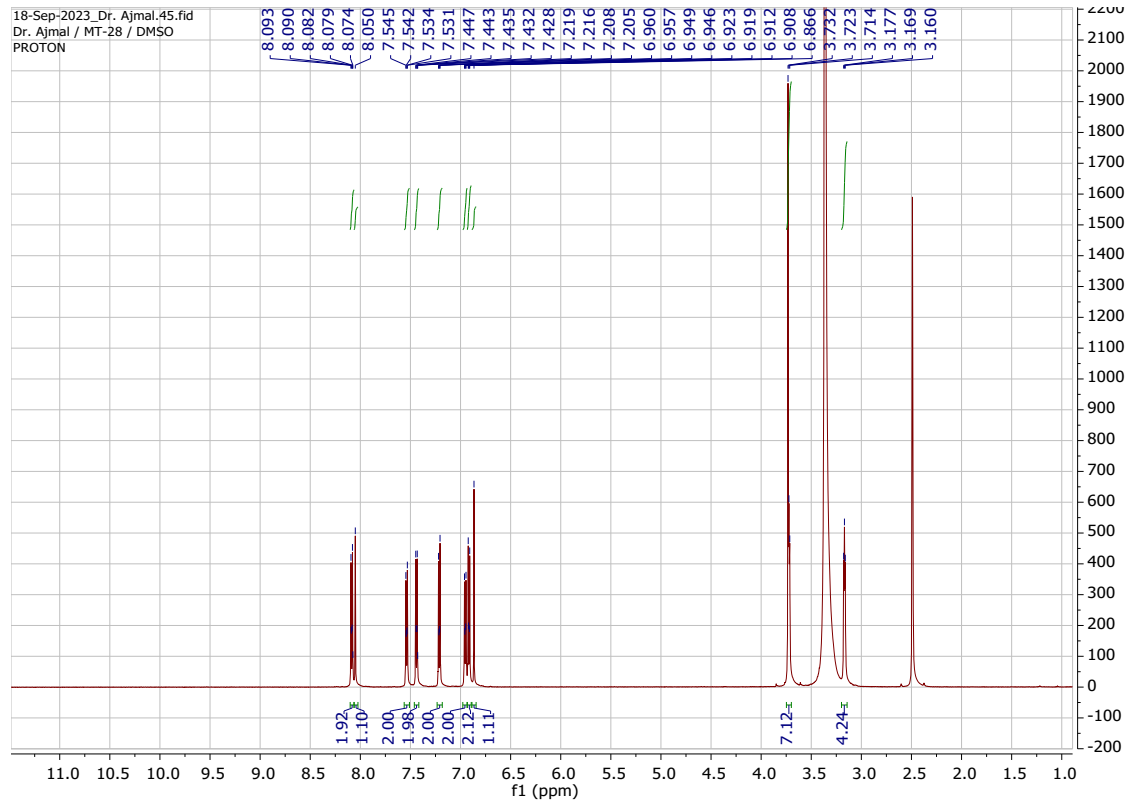

18-Sep-2023\_Dr. Ajmal.46.fid  
Dr. Ajmal / MT-28 / DMSO  
C13CPD

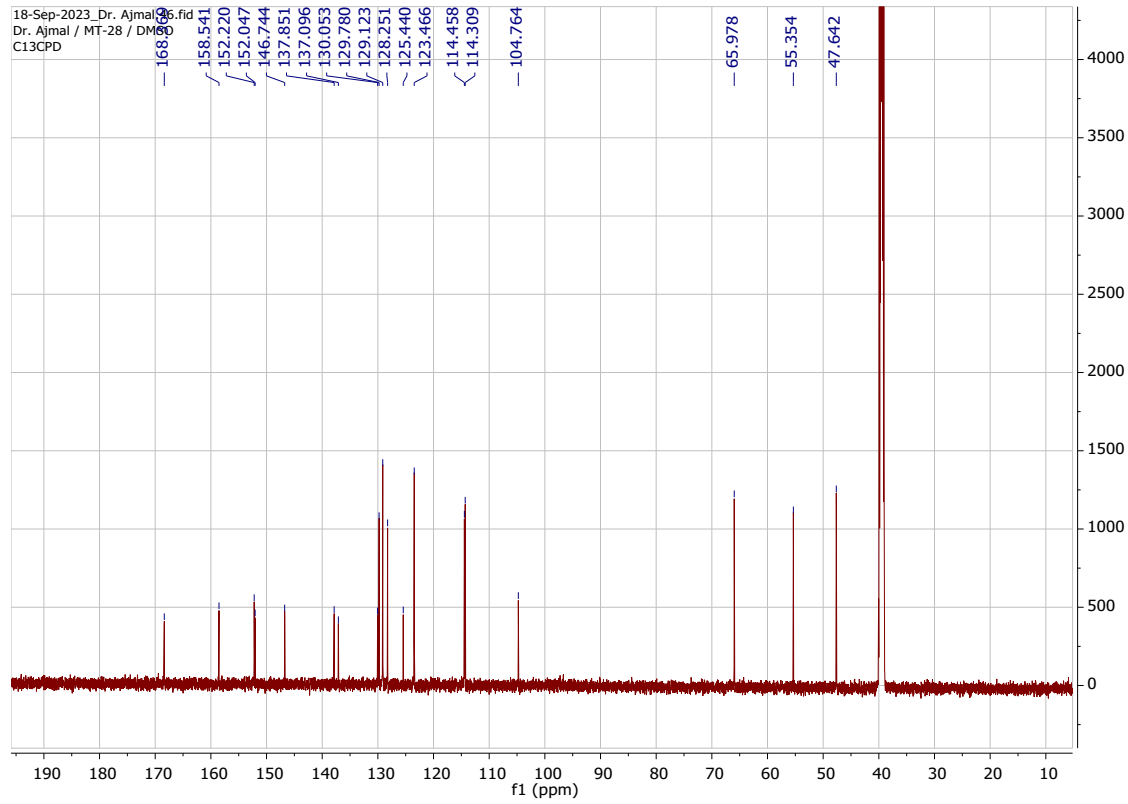

# <sup>1</sup>H NMR and <sup>13</sup>C NMR of 26:

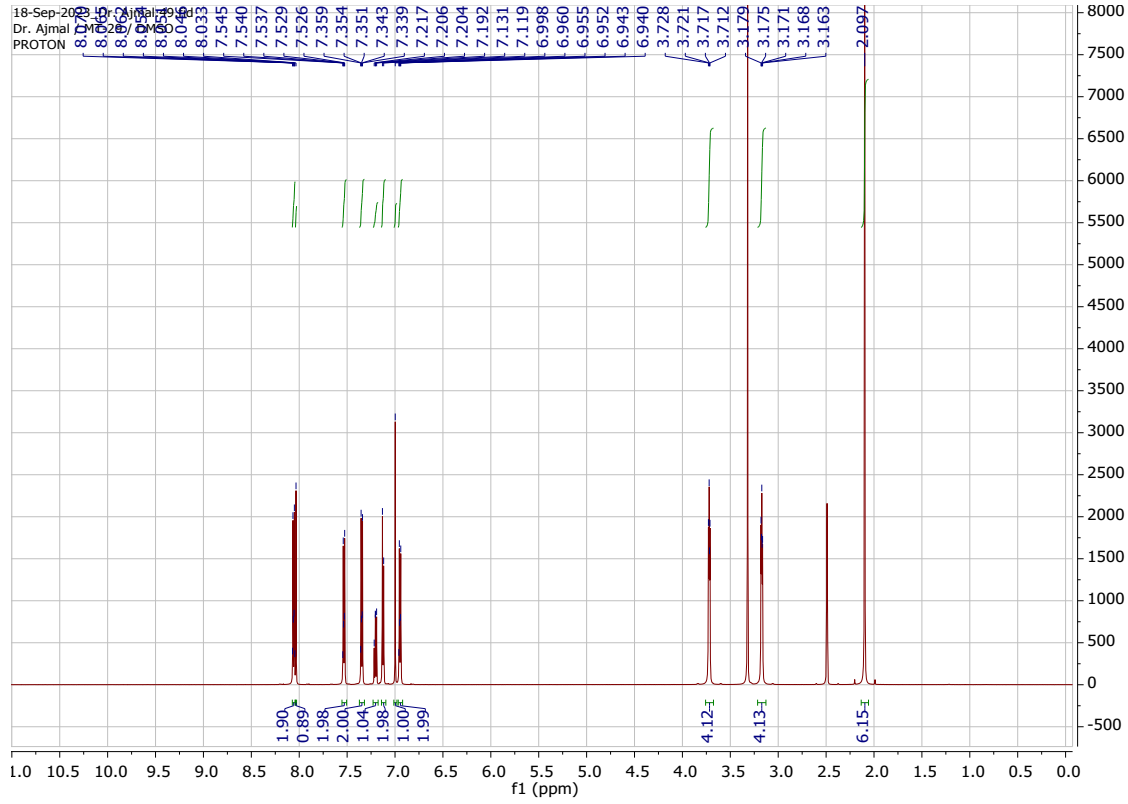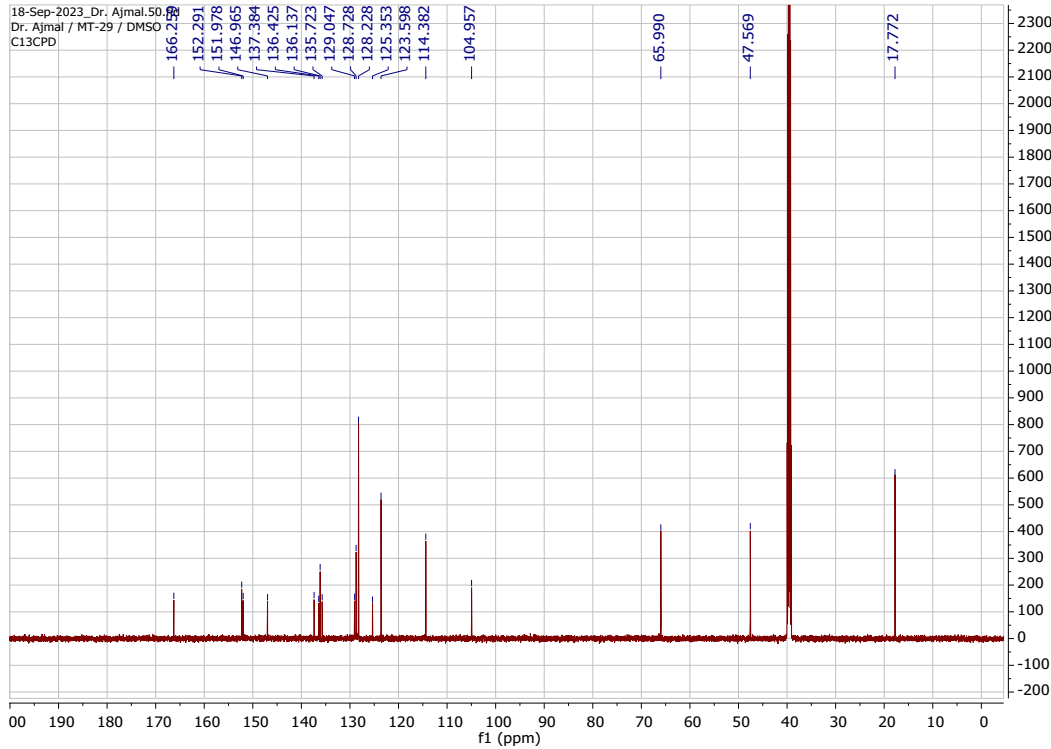



# <sup>1</sup>H NMR and <sup>13</sup>C NMR of 27:

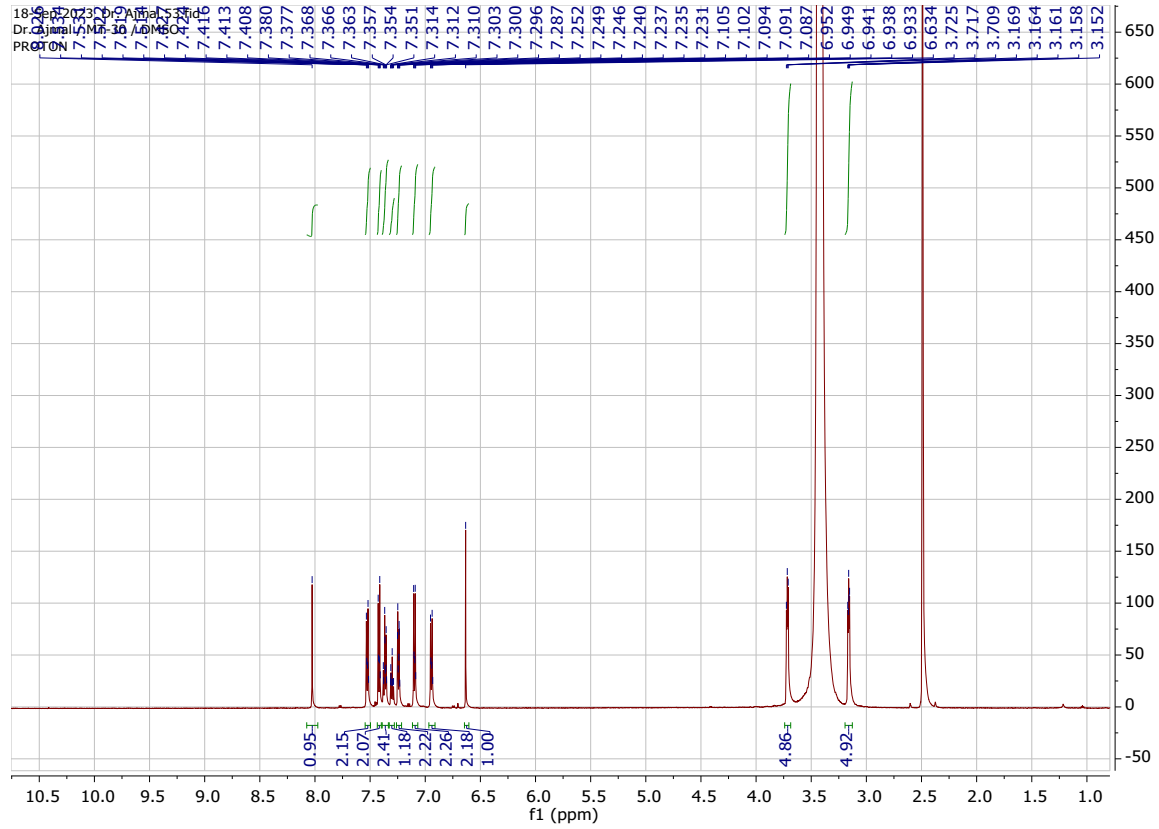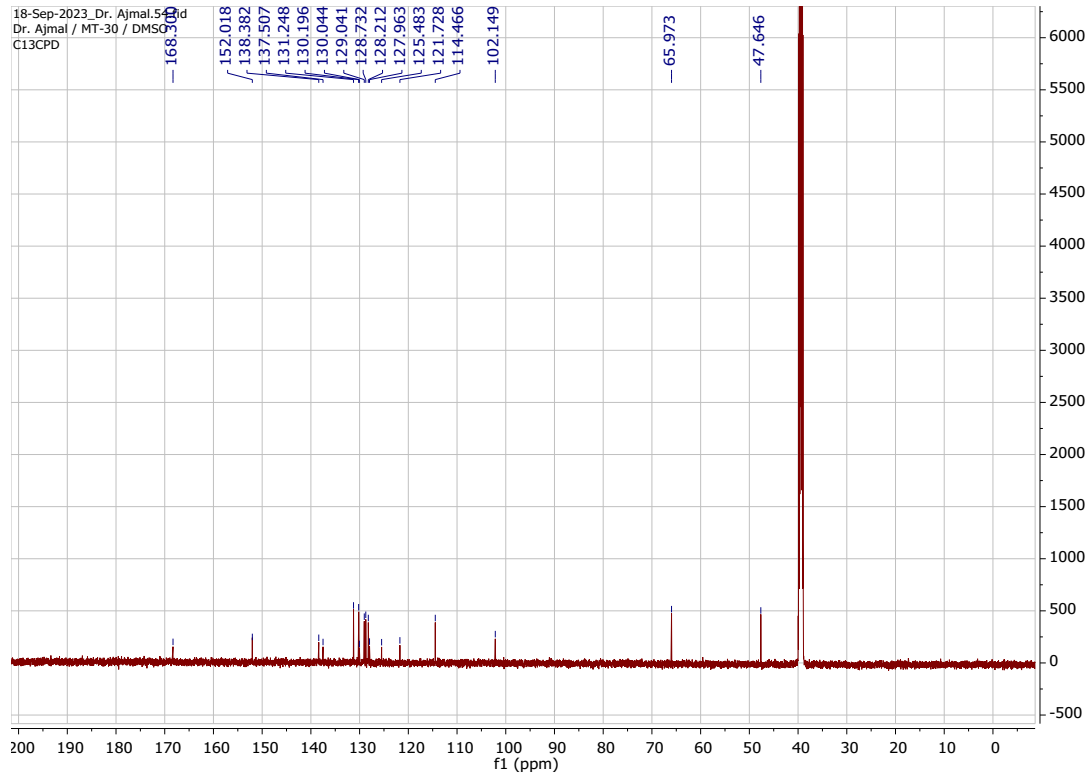

### QTOF-MS Spectrum of 3

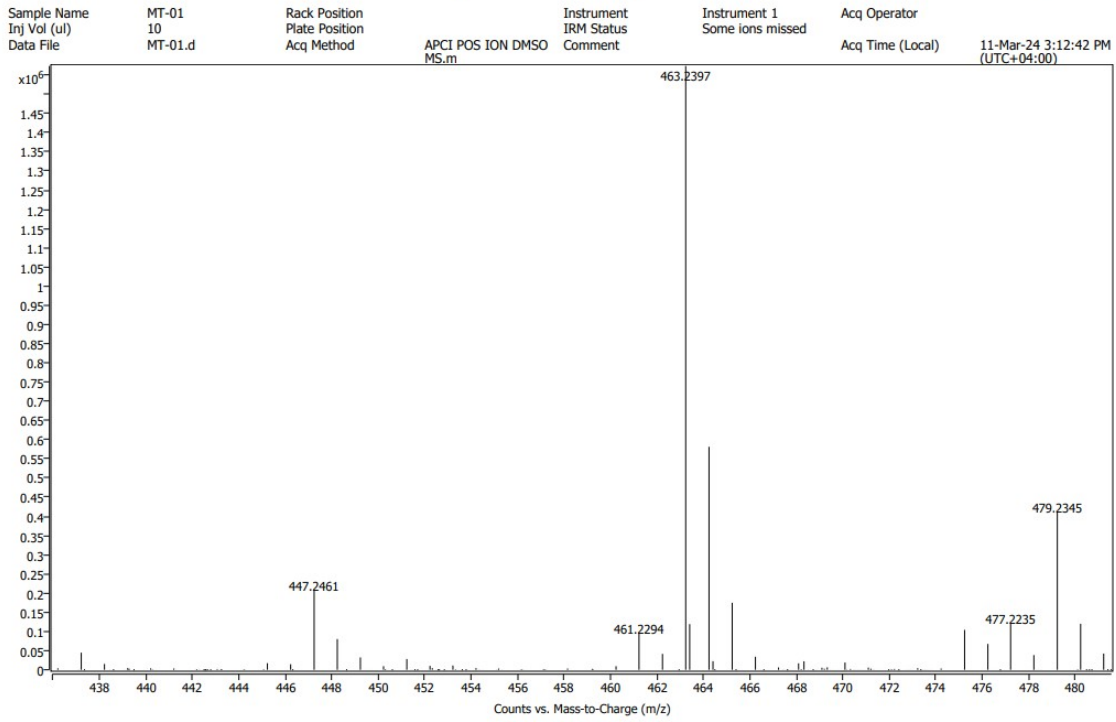

### QTOF-MS Spectrum of 4

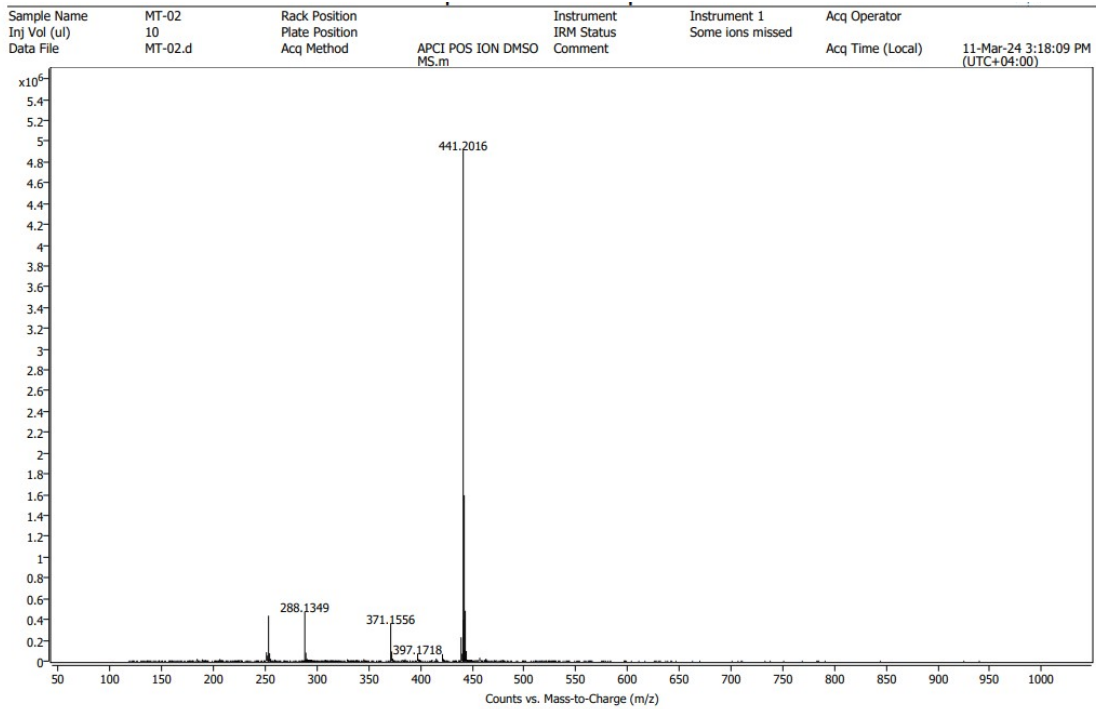

# QTOF-MS Spectrum of 5

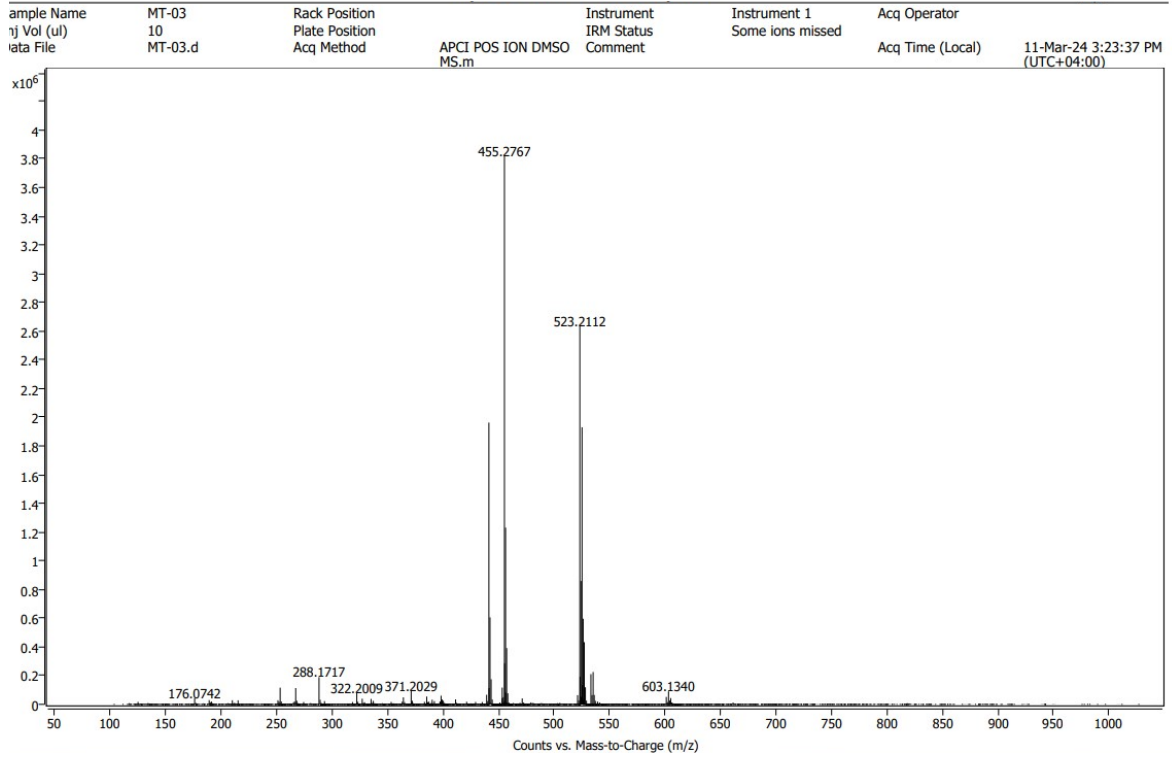

# QTOF-MS Spectrum of 6

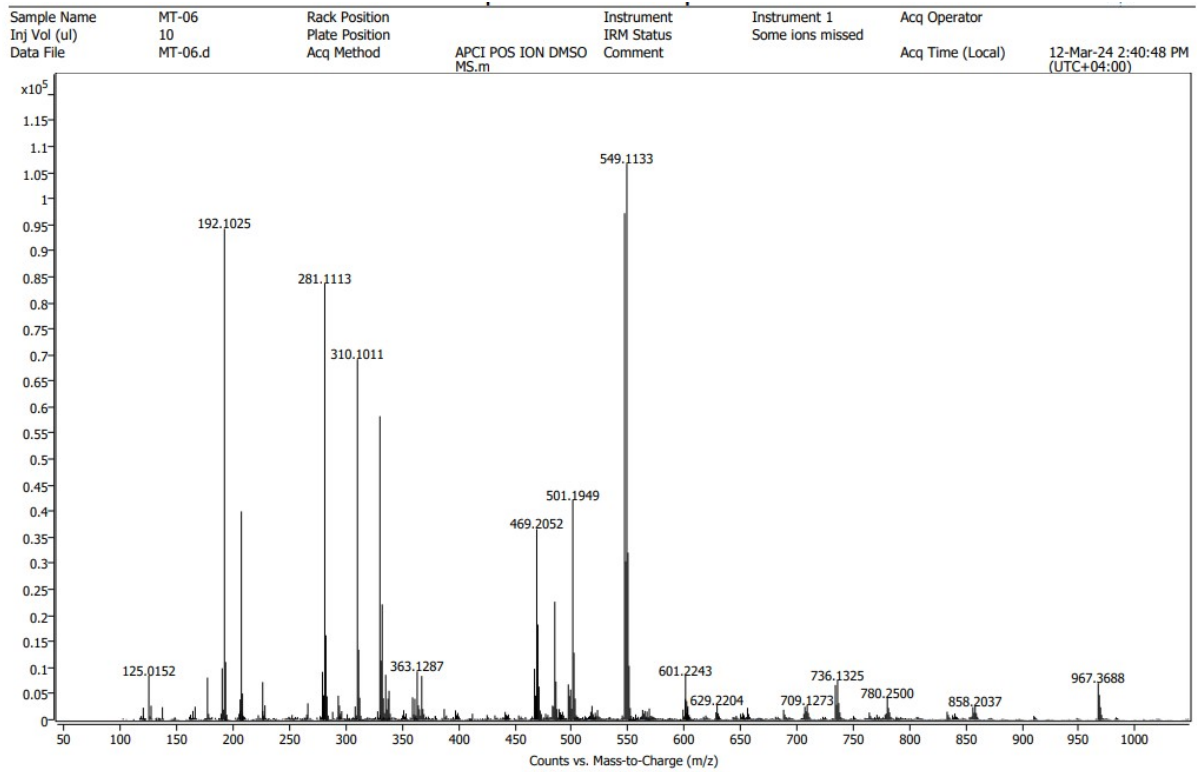

# QTOF-MS Spectrum of 7

|              |         |                |                        |            |                  |                                  |
|--------------|---------|----------------|------------------------|------------|------------------|----------------------------------|
| Sample Name  | MT-07   | Rack Position  |                        | Instrument | Instrument 1     | Acq Operator                     |
| Inj Vol (ul) | 10      | Plate Position |                        | IRM Status | Some ions missed |                                  |
| Data File    | MT-07.d | Acq Method     | APCI POS ION DMSO MS.m | Comment    |                  | Acq Time (Local)                 |
|              |         |                |                        |            |                  | 12-Mar-24 2:46:42 PM (UTC+04:00) |

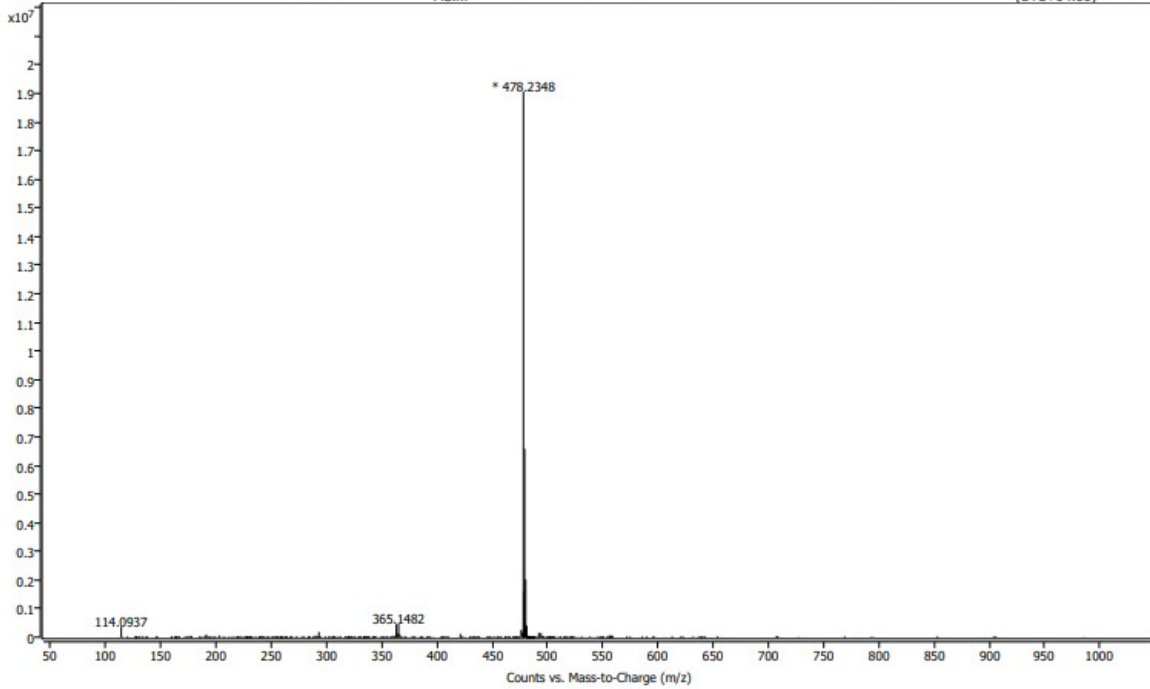

# QTOF-MS Spectrum of 8

|              |         |                |                        |            |                  |                                  |
|--------------|---------|----------------|------------------------|------------|------------------|----------------------------------|
| Sample Name  | M1-08   | Rack Position  |                        | Instrument | Instrument 1     | Acq Operator                     |
| Inj Vol (ul) | 10      | Plate Position |                        | IRM Status | Some ions missed |                                  |
| Data File    | MT-08.d | Acq Method     | APCI POS ION DMSO MS.m | Comment    |                  | Acq Time (Local)                 |
|              |         |                |                        |            |                  | 12-Mar-24 2:52:37 PM (UTC+04:00) |

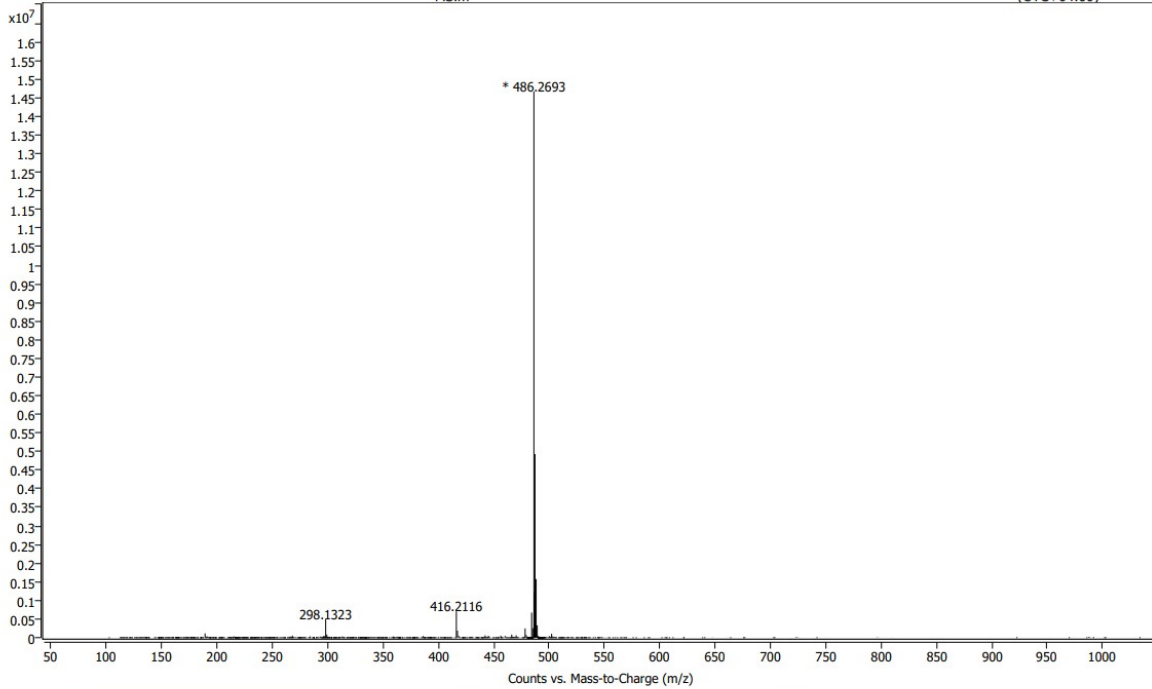

# QTOF-MS Spectrum of 9

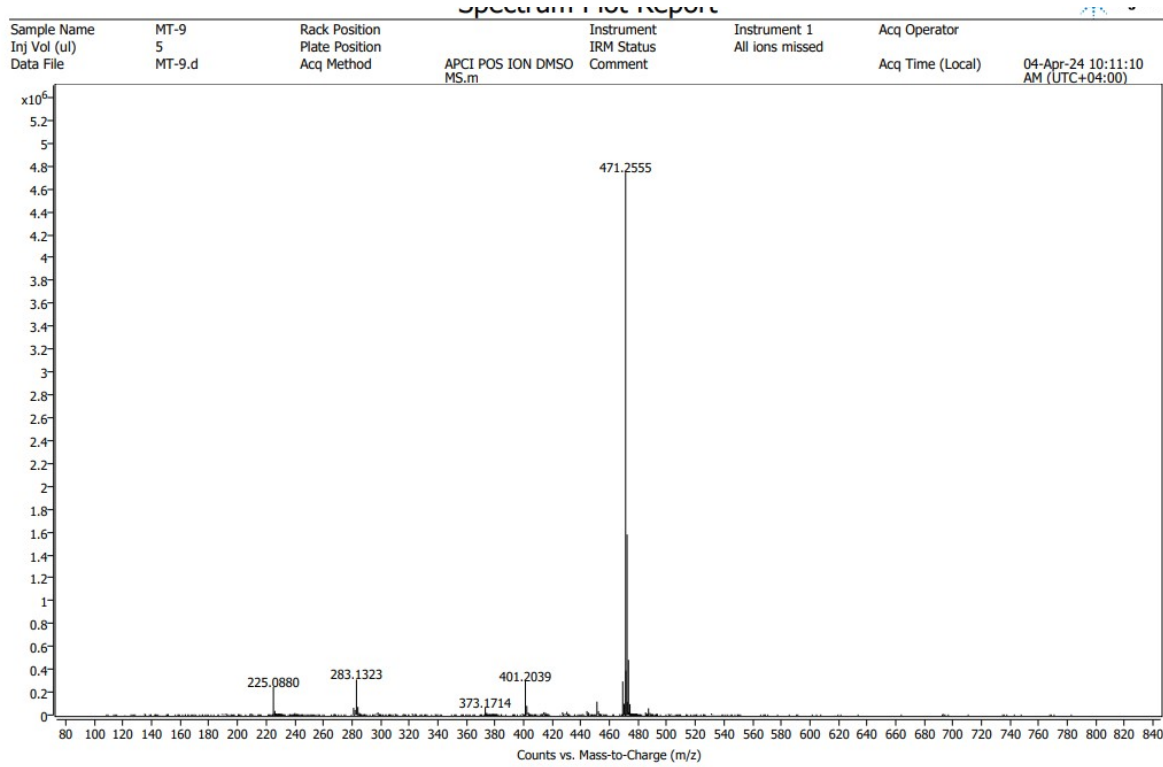

# QTOF-MS Spectrum of 10

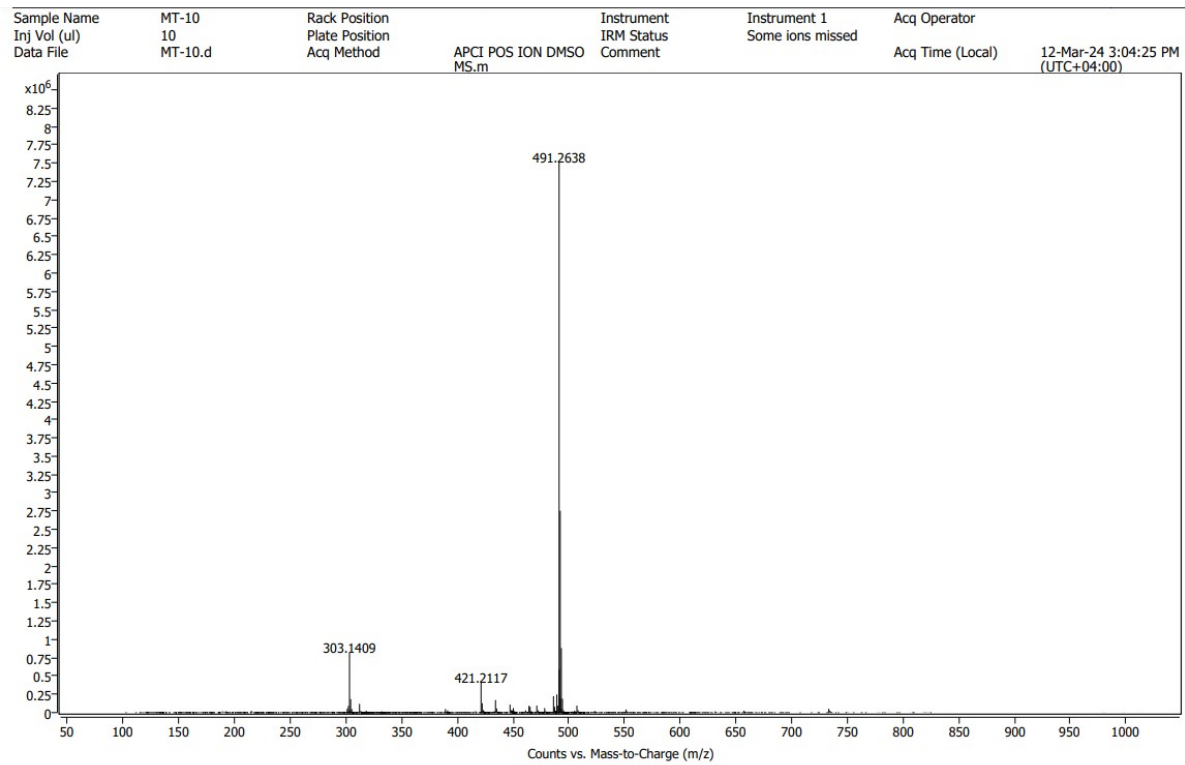

# QTOF-MS Spectrum of 11

|              |         |                |                        |            |                  |                                                   |
|--------------|---------|----------------|------------------------|------------|------------------|---------------------------------------------------|
| Sample Name  | MT-11   | Rack Position  |                        | Instrument | Instrument 1     | Acq Operator                                      |
| Inj Vol (ul) | 10      | Plate Position |                        | IRM Status | Some ions missed |                                                   |
| Data File    | MT-11.d | Acq Method     | APCI POS ION DMSO MS.m | Comment    |                  | Acq Time (Local) 12-Mar-24 3:10:22 PM (UTC+04:00) |

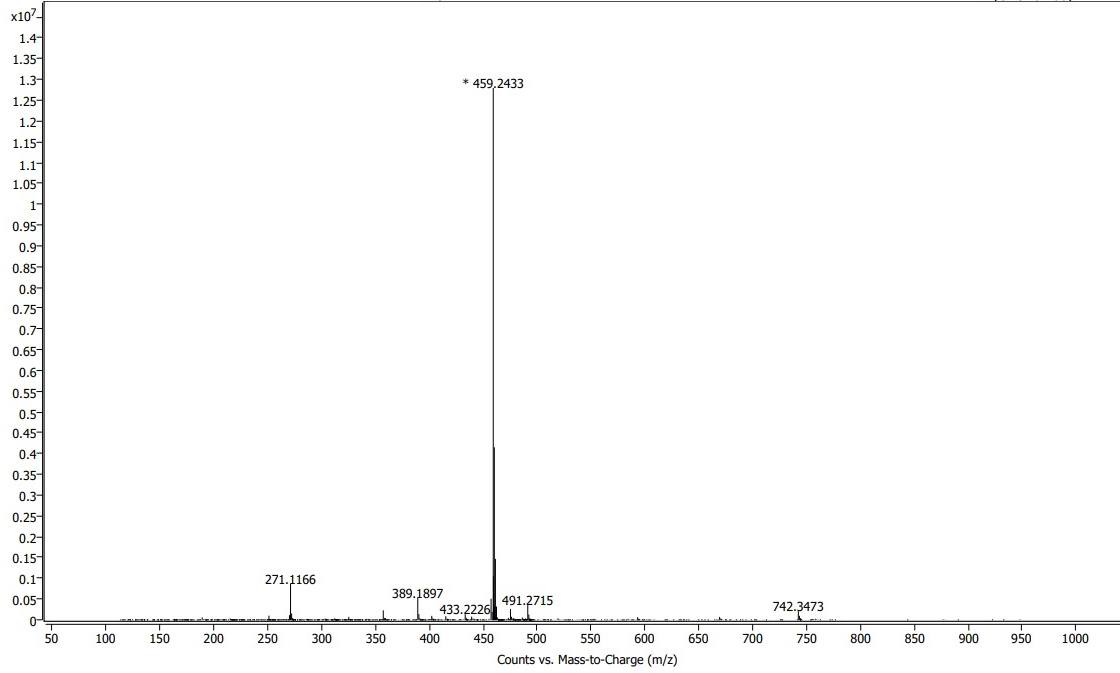

# QTOF-MS Spectrum of 12

|              |         |                |                        |            |                  |                                                   |
|--------------|---------|----------------|------------------------|------------|------------------|---------------------------------------------------|
| Sample Name  | MT-31   | Rack Position  |                        | Instrument | Instrument 1     | Acq Operator                                      |
| Inj Vol (ul) | 10      | Plate Position |                        | IRM Status | Some ions missed |                                                   |
| Data File    | MT-31.d | Acq Method     | APCI POS ION DMSO MS.m | Comment    |                  | Acq Time (Local) 13-Mar-24 1:17:23 PM (UTC+04:00) |

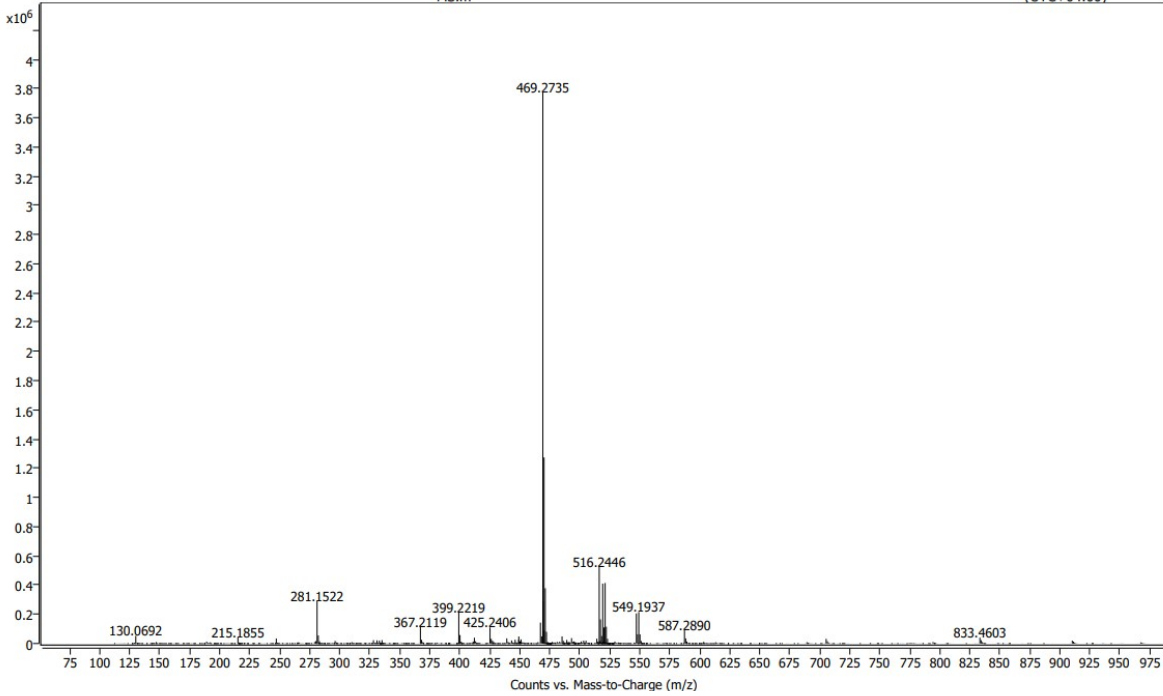

# QTOF-MS Spectrum of 13

|              |         |                   |            |                  |                                  |
|--------------|---------|-------------------|------------|------------------|----------------------------------|
| Sample Name  | MT-14   | Rack Position     | Instrument | Instrument 1     | Acq Operator                     |
| Inj Vol (ul) | 10      | Plate Position    | IRM Status | Some ions missed |                                  |
| Data File    | MT-14.d | Acq Method        | Comment    |                  | Acq Time (Local)                 |
|              |         | APCI POS ION DMSO |            |                  | 12-Mar-24 3:28:06 PM (UTC+04:00) |
|              |         | MS.m              |            |                  |                                  |

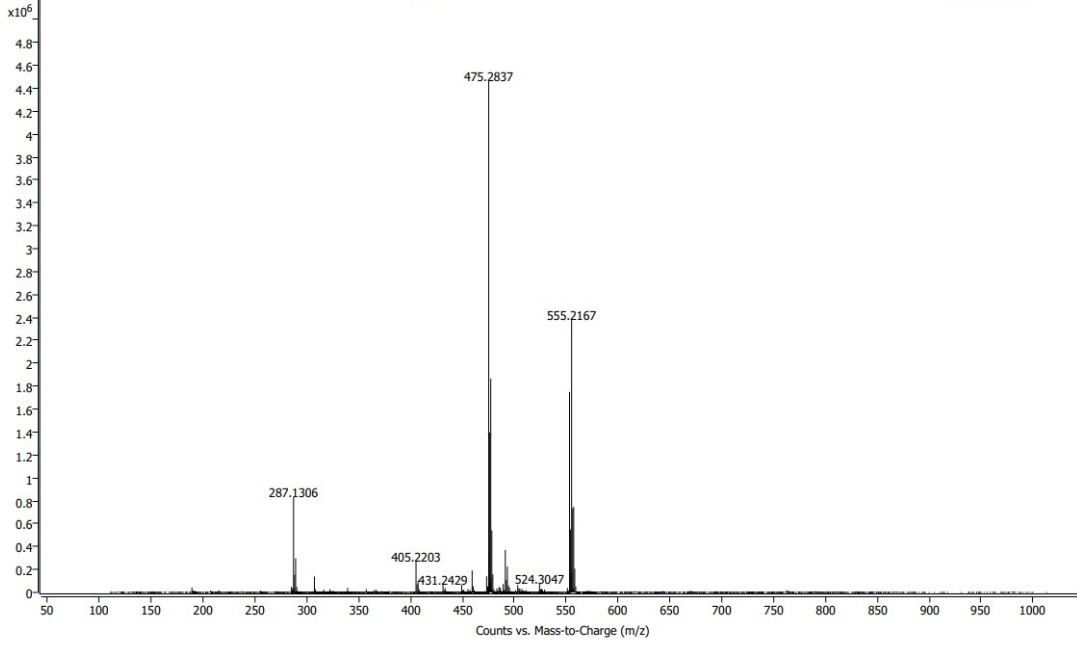

# QTOF-MS Spectrum of 14

|              |         |                   |            |                  |                                  |
|--------------|---------|-------------------|------------|------------------|----------------------------------|
| Sample Name  | MT-15   | Rack Position     | Instrument | Instrument 1     | Acq Operator                     |
| Inj Vol (ul) | 10      | Plate Position    | IRM Status | Some ions missed |                                  |
| Data File    | MT-15.d | Acq Method        | Comment    |                  | Acq Time (Local)                 |
|              |         | APCI POS ION DMSO |            |                  | 12-Mar-24 3:34:03 PM (UTC+04:00) |
|              |         | MS.m              |            |                  |                                  |

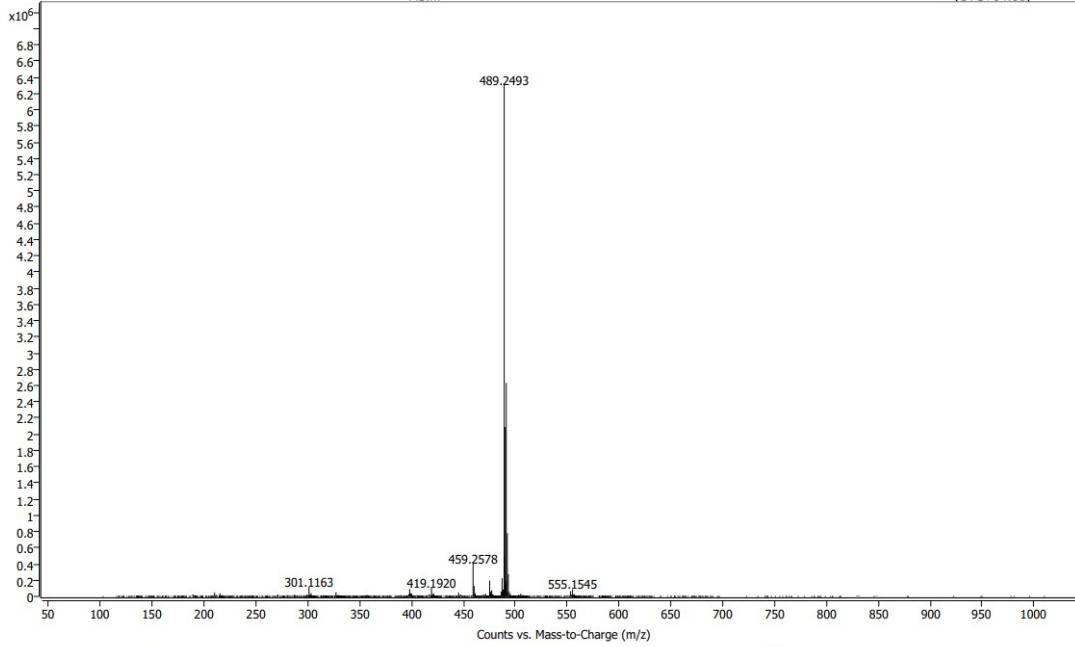

# QTOF-MS Spectrum of 15

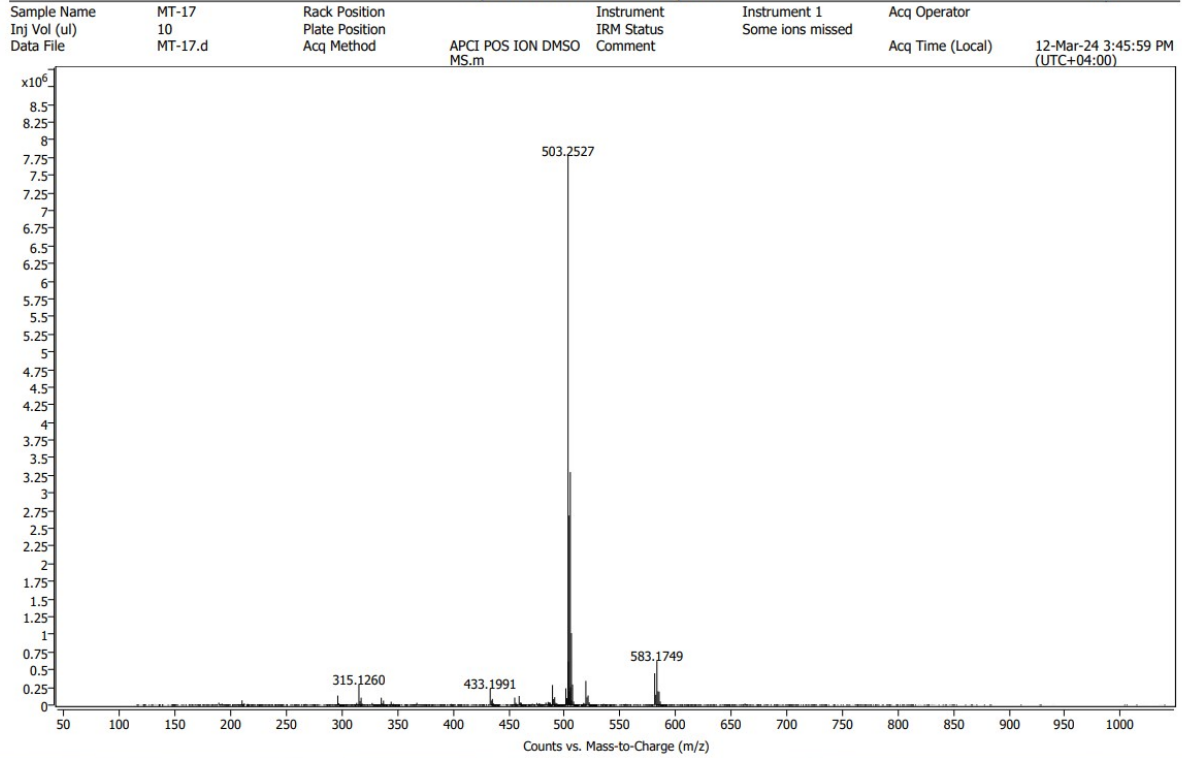

# QTOF-MS Spectrum of 16

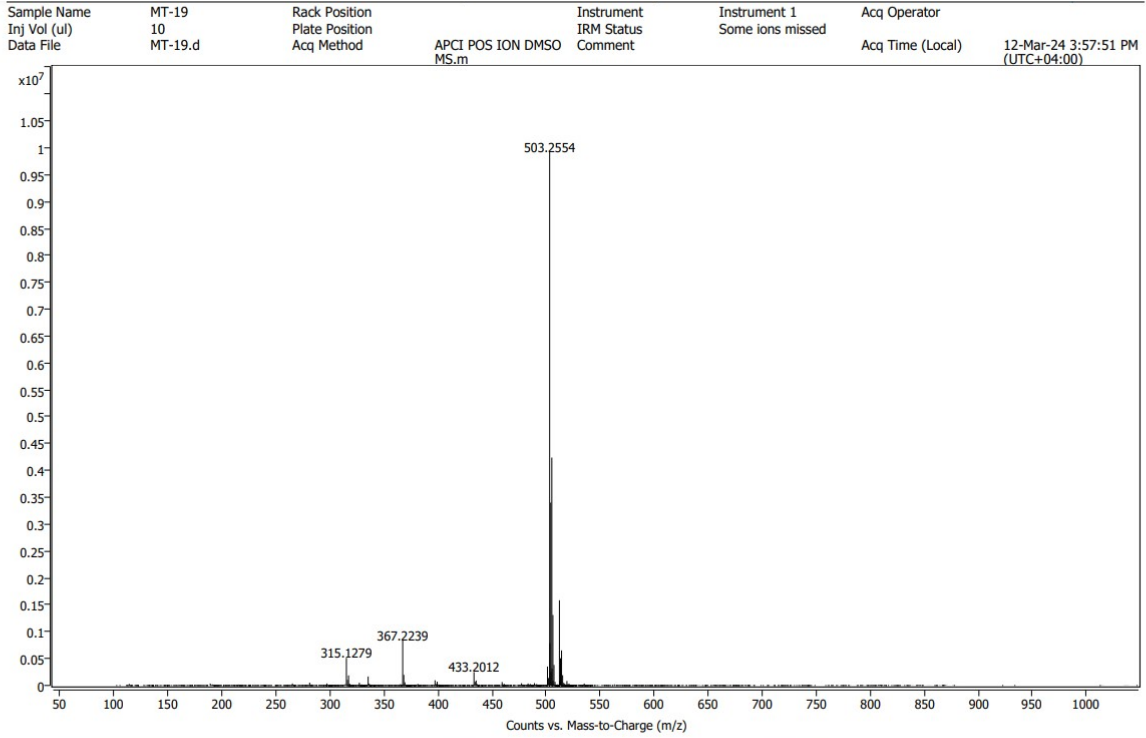



# QTOF-MS Spectrum of 17

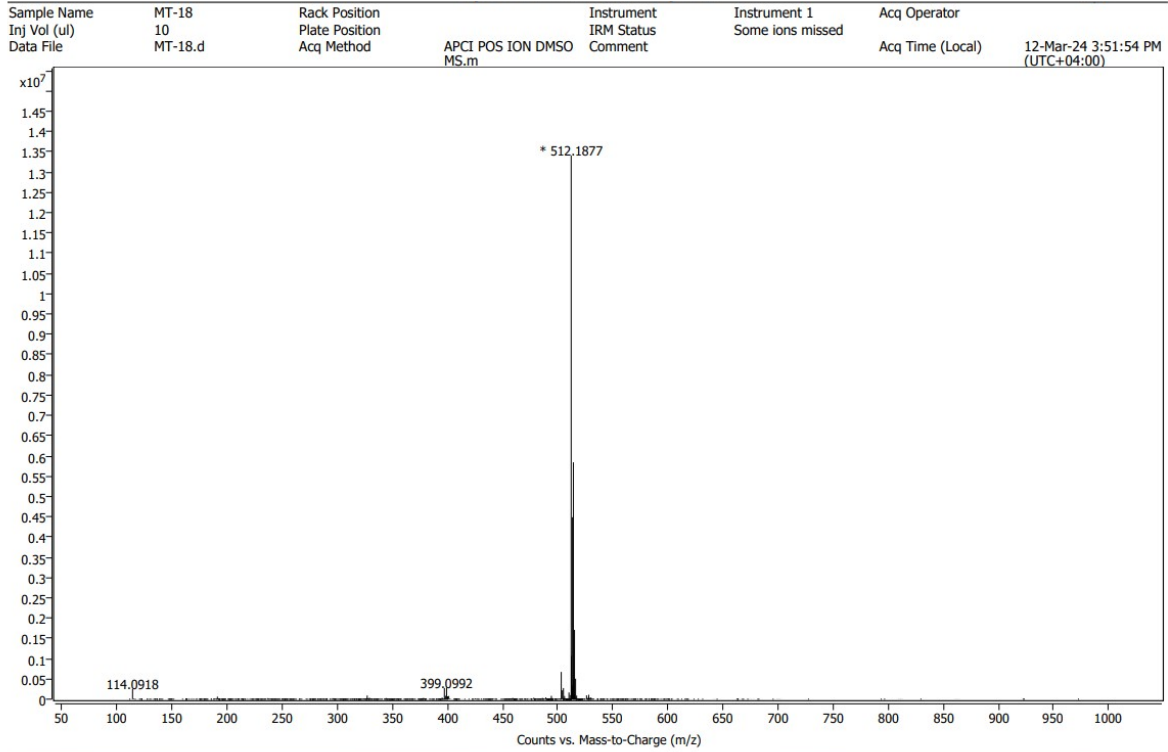

# QTOF-MS Spectrum of 18

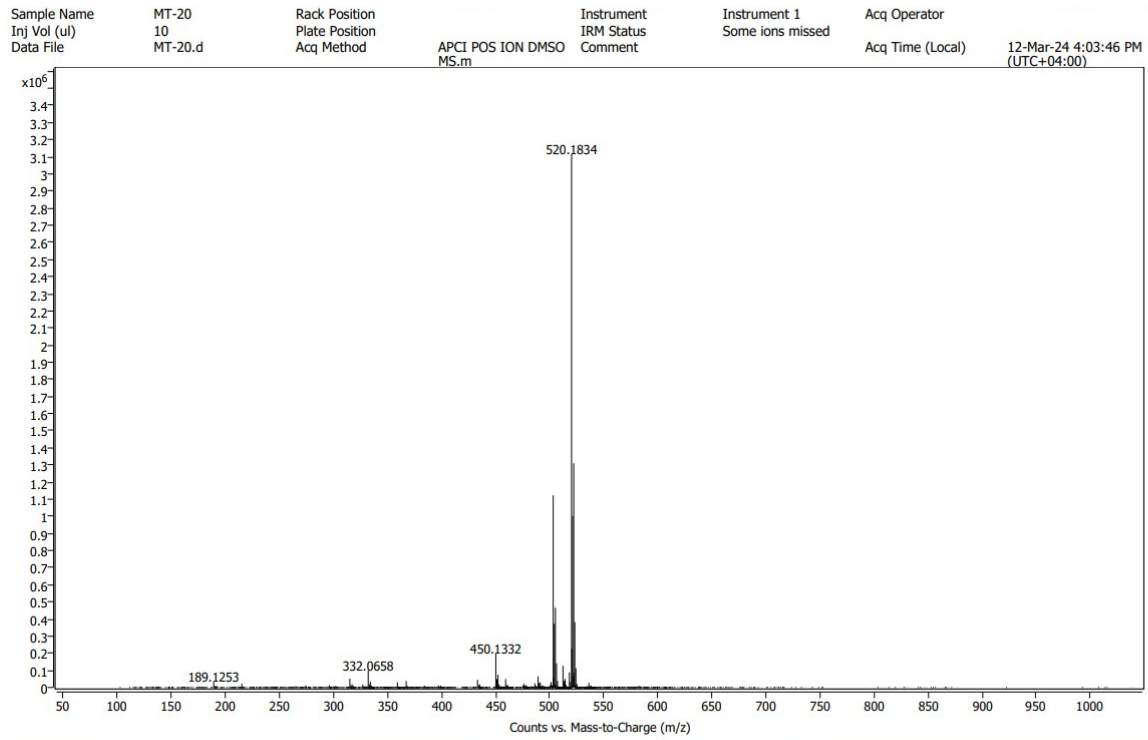

# QTOF-MS Spectrum of 19

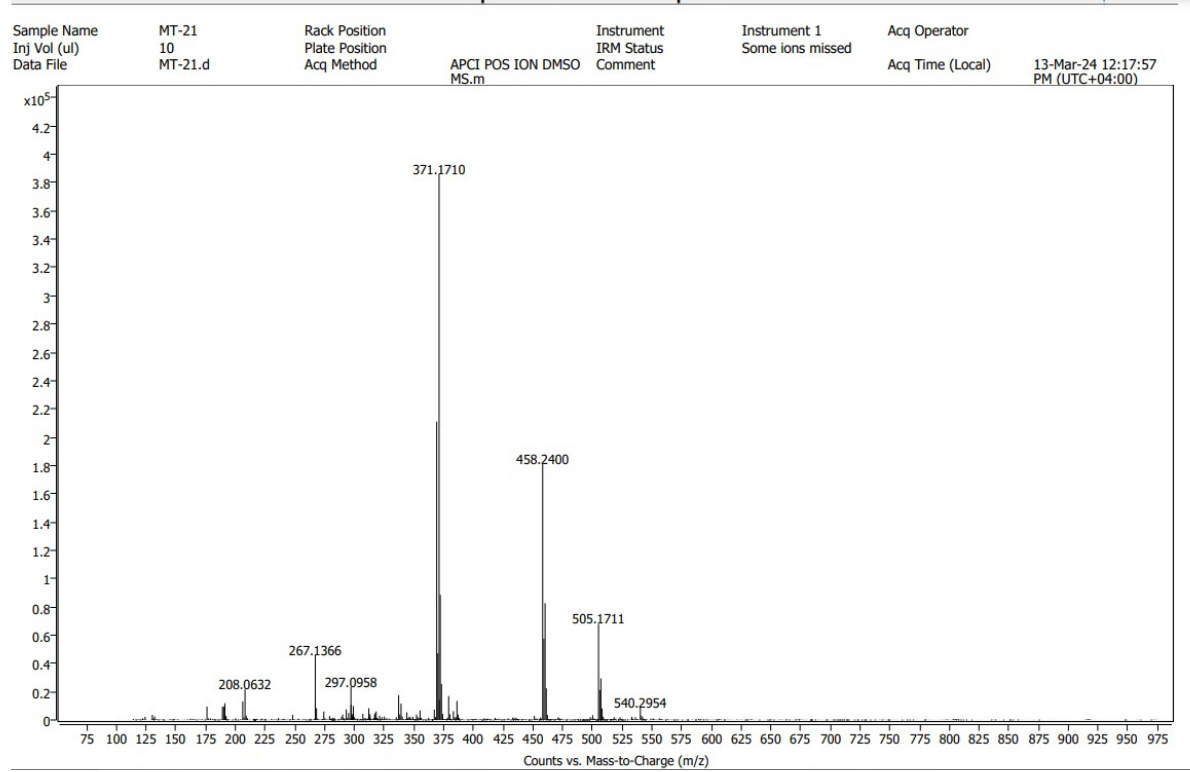

# QTOF-MS Spectrum of 20

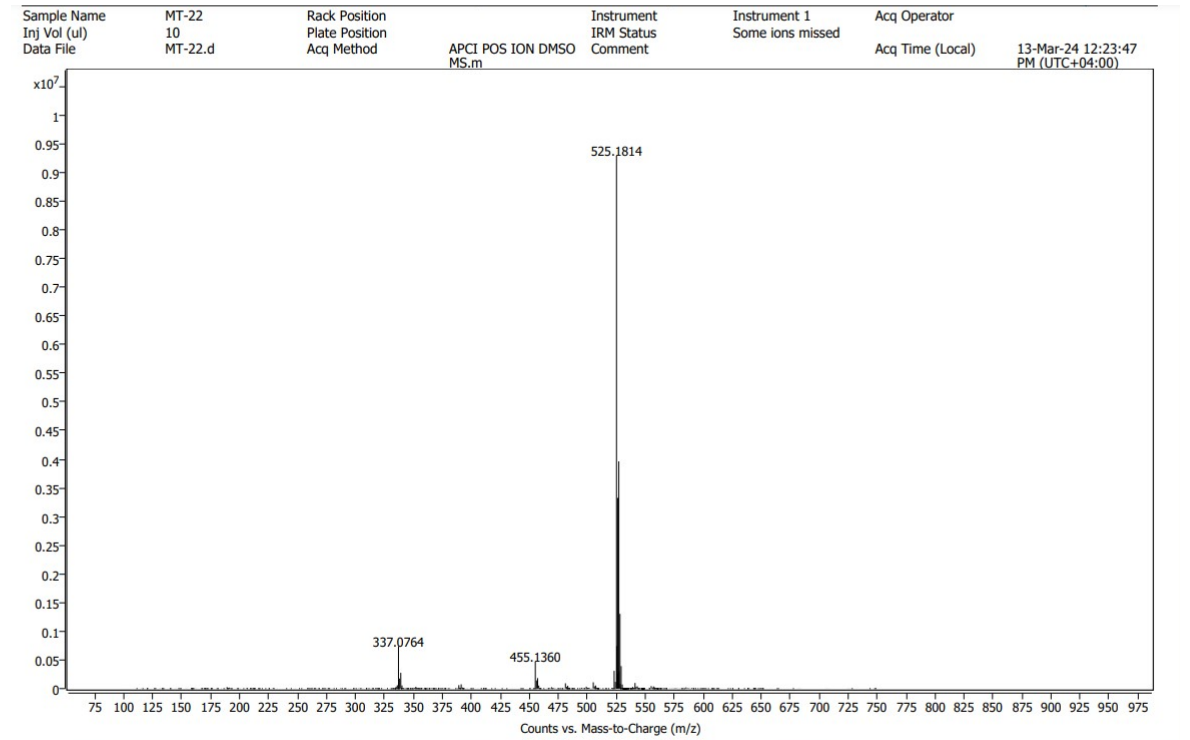

# QTOF-MS Spectrum of 21

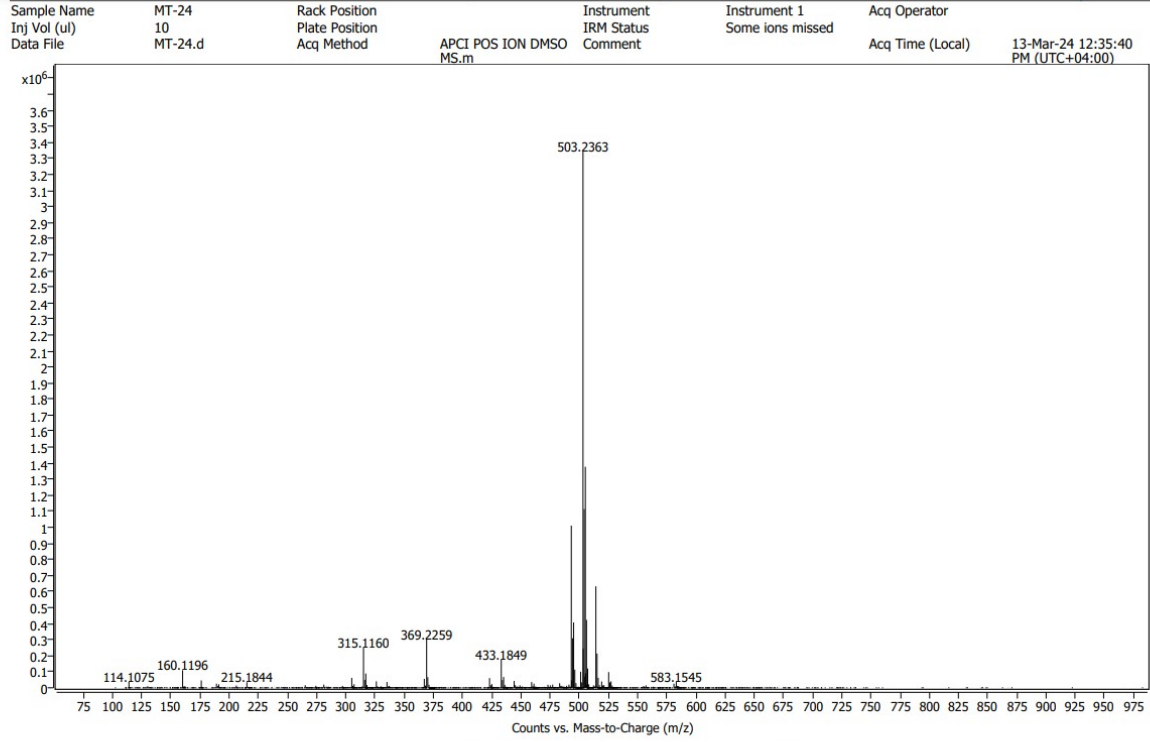

# QTOF-MS Spectrum of 22

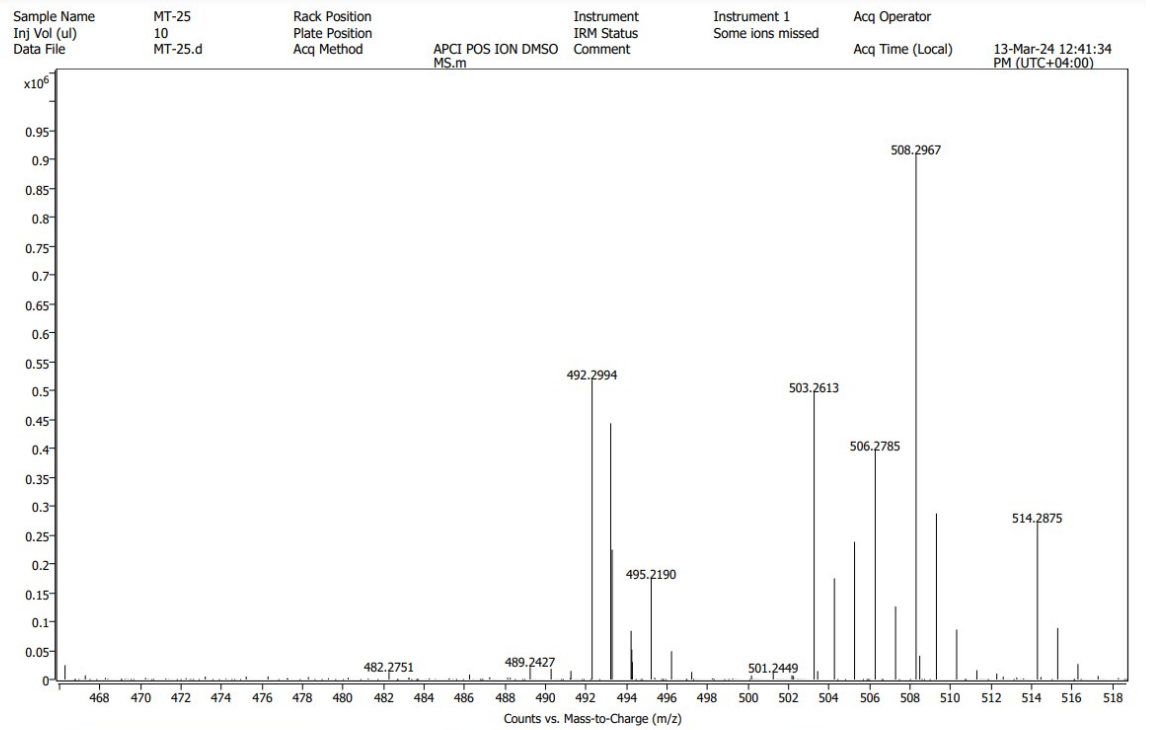

# QTOF-MS Spectrum of 23

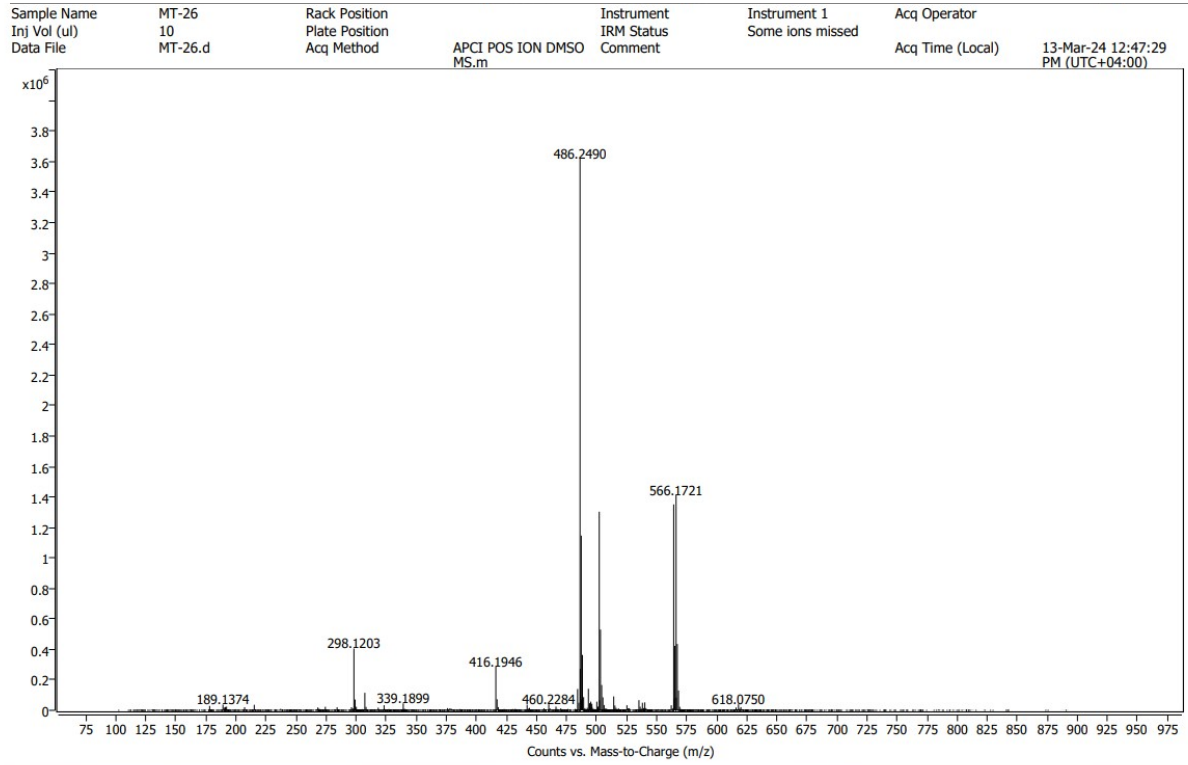

# QTOF-MS Spectrum of 24

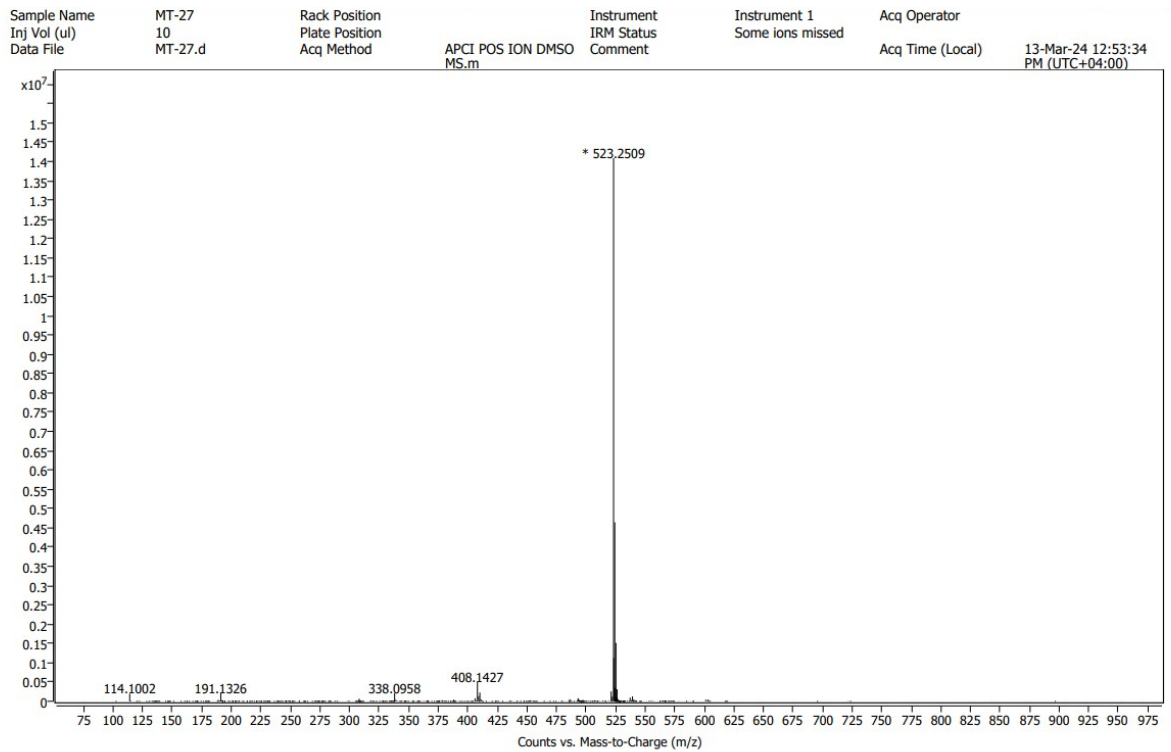

# QTOF-MS Spectrum of 25

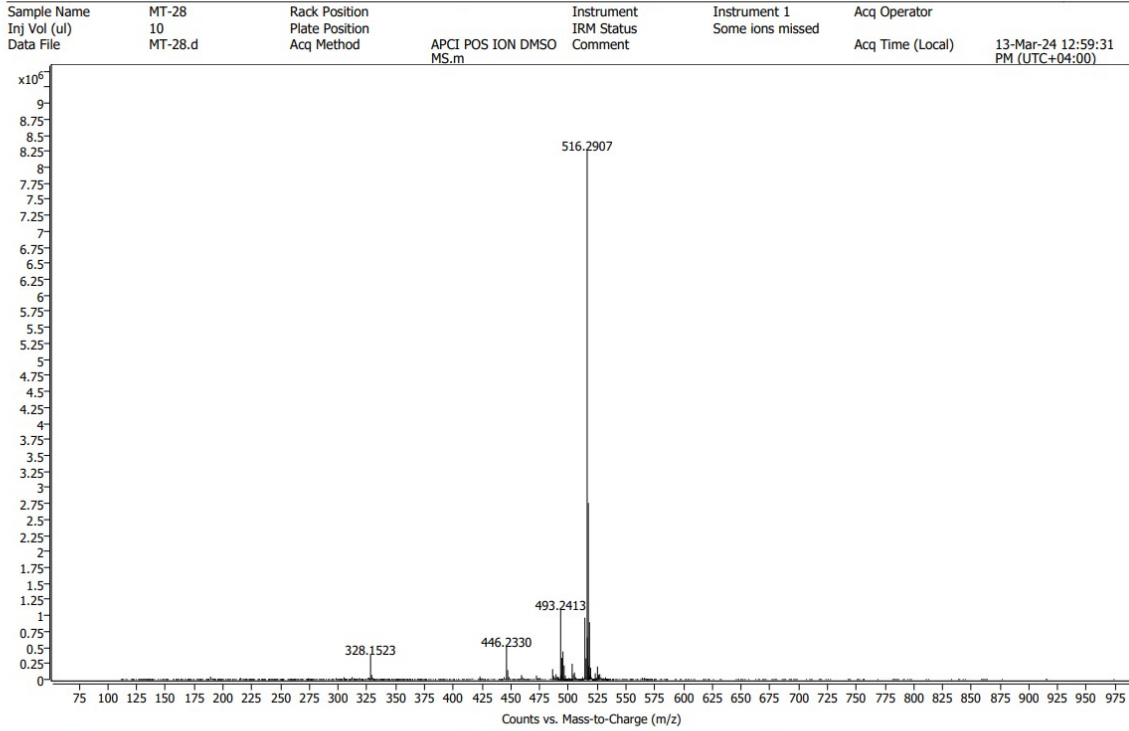

# QTOF-MS Spectrum of 26

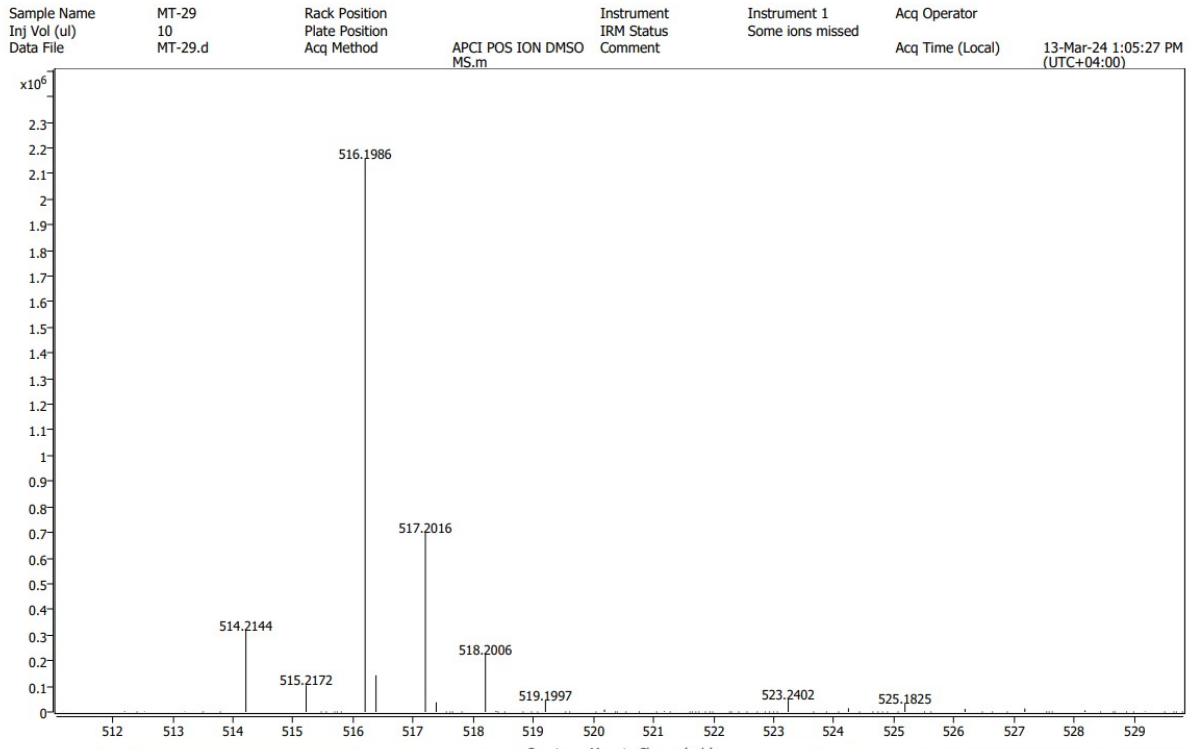

## QTOF-MS Spectrum of 27

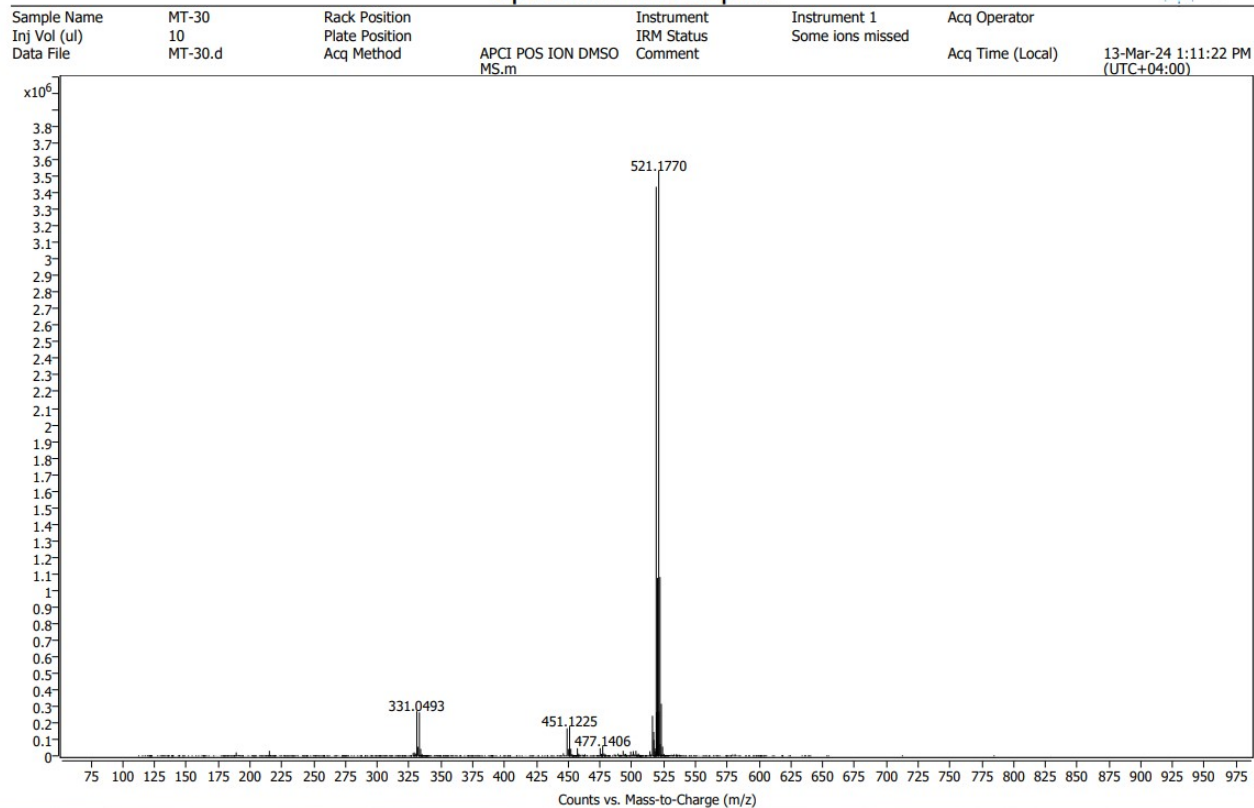

**Table S1.** Dataset splitting for the QSAR modelling

| ID | Comp. Name | Status     | $Y_{\text{cal. Exp. endpoint}}$ | $Y_{\text{Pred. by model eq.}}$ | Error   |
|----|------------|------------|---------------------------------|---------------------------------|---------|
| 1  | 3          | Prediction | 4.51                            | 4.0323                          | -0.4777 |
| 2  | 4          | Training   | 4.61                            | 4.639                           | 0.029   |
| 3  | 5          | Training   | 4.57                            | 4.5481                          | -0.0219 |
| 4  | 6          | Training   | 4.46                            | 4.4517                          | -0.0083 |
| 5  | 7          | Training   | 4.42                            | 4.4326                          | 0.0126  |
| 6  | 8          | Training   | 4.56                            | 4.4507                          | -0.1093 |
| 7  | 9          | Training   | 4.47                            | 4.4984                          | 0.0284  |
| 8  | 10         | Training   | 4.4                             | 4.4975                          | 0.0975  |
| 9  | 11         | Prediction | 4.35                            | 4.56                            | 0.21    |
| 10 | 12         | Prediction | 4.33                            | 4.2367                          | -0.0933 |
| 11 | 13         | Training   | 4.5                             | 4.4835                          | -0.0165 |
| 12 | 14         | Training   | 4.45                            | 4.3885                          | -0.0615 |
| 13 | 15         | Training   | 4.3                             | 4.2933                          | -0.0067 |
| 14 | 16         | Training   | 4.24                            | 4.2696                          | 0.0296  |
| 15 | 17         | Training   | 4.29                            | 4.2882                          | -0.0018 |

|    |    |            |      |        |         |
|----|----|------------|------|--------|---------|
| 16 | 18 | Training   | 4.22 | 4.2972 | 0.0772  |
| 17 | 19 | Training   | 4.31 | 4.3509 | 0.0409  |
| 18 | 20 | Training   | 4.44 | 4.3882 | -0.0518 |
| 19 | 21 | Prediction | 4.41 | 4.0794 | -0.3306 |
| 20 | 22 | Prediction | 4.7  | 4.3578 | -0.3422 |
| 21 | 23 | Training   | 4.78 | 4.8211 | 0.0411  |
| 22 | 24 | Training   | 4.83 | 4.8231 | -0.0069 |
| 23 | 25 | Training   | 4.78 | 4.7482 | -0.0318 |
| 24 | 26 | Training   | 4.46 | 4.4201 | -0.0399 |
| 25 | 27 | Prediction | 4.62 | 4.3779 | -0.2421 |

## Stepwise procedure for generation of GA-MLR based QSAR Modeling

### *Structure drawing, optimization and calculations of molecular descriptors*

All structures of substituted 25 molecules were drawn using ChemBioDraw V.12.1. Furthermore, these 2D- structures were then converted to 3D- forms using the Chem3Dpro tool. Then, the MMFF94 force field was used for the optimization of all structures using TINKER. Open3DAlign was incorporated for alignments of the dataset molecules. Finally, PaDEL and ChemDes (a free web-based platform) were used for the calculations of molecular descriptors.

### *Pruning of molecular descriptors*

It is important to note that pruning of molecular descriptors is a key step while developing QSAR models as PaDEL and ChemDes would provide more than >20,000 molecular descriptors including 1D- to 3D- for each molecule. Thus, the objective feature selection module from QSARINS ver. 2.2.2 was employed to exclude descriptors with high co-linearity ( $|r| > 0.90$ ) and nearly constant ( $> 95\%$ ) values. This avoided the inclusion of multi-collinear and spurious variables in GA-MLR models (the genetic algorithm–multi-linear regression models). At the end of the descriptor pruning step, we retained a dataset with **1394** molecular descriptors covering mono-dimensional (1D-), bi-dimensional (2D-) and three-dimensional (3D-) descriptor spaces (including but not limited to fingerprint, atom-pair and other molecular descriptors). Moreover, to avoid difficulty in QSAR model interpretations, we have removed various esoteric descriptors (the descriptors for which an exact explanation is not available) in the very next step.

### *QSAR model building*

For the developments of statistically robust GA-MLR-based QSAR models, we utilized a popular QSARINS software. All derived models were then subjected to thorough external as well as internal statistical validations, Y-randomization and applicability domain analysis. These validations were carried out as per the OECD principles. The OECD principles followed for the developments of good statistical models are mentioned below:

(1) For the QSAR model developments, we first divided our dataset randomly using the random splitting option of QSARINS into training and test sets, i.e., prediction set. The splitting of datasets into a training and test set were carried out using well-established approaches of 70%, training set :30%, prediction set. Then, these training sets were used for the building of QSAR models, while prediction sets were employed for the external validation's parameters. We had also carried out the multiple splitting of dataset molecules in such a way that, every molecule would become part of training or test set during QSAR model developments. This technique ensured that maximum number and information was gained through molecular descriptors impacting or affecting biological potential/ activity.

1. While developing the GA-MLR-based QSAR models, we have kept all default settings available in QSARINS with  $Q^2_{\text{LOO}}$  as a selected fitness function. Furthermore, we noted that the value of  $Q^2_{\text{LOO}}$  was increased up to 4 variables, however after four variables,  $Q^2_{\text{LOO}}$  had only minor increments in it. Thus, models having 1-4 variables with best-selected fitness functions were further selected and analysed to avoid over-fitting issues. The values for the descriptors mentioned in our best QSAR models are available in the supporting information.

### ***QSAR model validation***

All our developed models were thoroughly validated using OECD principles of internal and external validations, Y-randomization and AD analysis. The statistical robustness and strength of QSAR model is based on (1) using external validation; (2) Y-randomization (or Y-scrambling); (3) internal validation based on leave-one-out (LOO) and leave-many-out (LMO) procedure (i.e., cross-validation (CV)); and (4) fulfilling of respective threshold values for the statistical parameters as follows:

$r^2_{\text{ex}} \geq 0.6$ ,  $\text{RMSE}_{\text{tr}} < \text{RMSE}_{\text{cv}}$ ,  $\Delta K \geq 0.05$ ,  $Q^2\text{-F}^n \geq 0.60$ ,  $r^2_{\text{tr}} \geq 0.6$ ,  $Q^2_{\text{loo}} \geq 0.5$ ,  $Q^2_{\text{LMO}} \geq 0.6$ ,  $r^2 > Q^2$ ,  $r^2_{\text{m}} \geq 0.6$ ,  $\text{CCC} \geq 0.80$ ,  $(1-r^2/r_o^2) < 0.1$ ,  $0.9 \leq k \leq 1.1$  or  $(1-r^2/r_o^2) < 0.1$ ,  $0.9 \leq k' \leq 1.1$ ,  $|r_o^2 - r_o'^2| < 0.3$ , RMSE and MAE closer to zero. It is thus, noted that any of models unable to satisfy these criteria should be omitted.
